# Supplementary material
Source: PubMed Central journal article supplement (PMC2670194)

Isolation, Structure Elucidation and Synthesis of Eudistomides A and B, Lipopeptides from a Fijian Ascidian *Eudistoma* sp.

*Emily L. Whitson, Anokha S. Ratnayake, Tim S. Bugni, Mary Kay Harper, Chris M. Ireland*

Department of Medicinal Chemistry, University of Utah, Salt Lake City, Utah 84112

**Supporting Info**

|            |                                                                                                                           |         |
|------------|---------------------------------------------------------------------------------------------------------------------------|---------|
| <b>S2</b>  | General experimental procedures, acetylation reaction conditions, and lipase reaction conditions.                         | Page 2  |
| <b>S3</b>  | <sup>1</sup> H NMR Spectrum of Eudistomide A ( <b>1</b> ) in CDCl <sub>3</sub>                                            | Page 3  |
| <b>S4</b>  | <sup>13</sup> C NMR Spectrum of Eudistomide A ( <b>1</b> ) in CDCl <sub>3</sub>                                           | Page 4  |
| <b>S5</b>  | <sup>1</sup> H NMR Spectrum of Eudistomide B ( <b>2</b> ) in CDCl <sub>3</sub>                                            | Page 5  |
| <b>S6</b>  | <sup>1</sup> H NMR Spectrum of 12-( <i>tert</i> -butyldimethylsilyloxy)dodecan-1-ol ( <b>5</b> ) in CD <sub>3</sub> OD    | Page 6  |
| <b>S7</b>  | <sup>13</sup> C NMR Spectrum of 12-( <i>tert</i> -butyldimethylsilyloxy)dodecan-1-ol ( <b>5</b> ) in CD <sub>3</sub> OD   | Page 7  |
| <b>S8</b>  | <sup>1</sup> H NMR Spectrum of 14-( <i>tert</i> -butyldimethylsilyloxy)tetradecan-3-ol ( <b>6</b> ) in CDCl <sub>3</sub>  | Page 8  |
| <b>S9</b>  | <sup>13</sup> C NMR Spectrum of 14-( <i>tert</i> -butyldimethylsilyloxy)tetradecan-3-ol ( <b>6</b> ) in CDCl <sub>3</sub> | Page 9  |
| <b>S10</b> | <sup>1</sup> H NMR Spectrum of tetradecane-1,12-diol ( <b>7</b> ) in CDCl <sub>3</sub>                                    | Page 10 |
| <b>S11</b> | <sup>13</sup> C NMR Spectrum of tetradecane-1,12-diol ( <b>7</b> ) in CDCl <sub>3</sub>                                   | Page 11 |
| <b>S12</b> | <sup>1</sup> H NMR Spectrum of 12-oxo-tetradecanoic acid ( <b>8</b> ) in CDCl <sub>3</sub>                                | Page 12 |
| <b>S13</b> | <sup>13</sup> C NMR Spectrum of 12-oxo-tetradecanoic acid ( <b>8</b> ) in CDCl <sub>3</sub>                               | Page 13 |
| <b>S14</b> | <sup>1</sup> H NMR Spectrum of cyclic pentapeptide ( <b>9</b> ) in DMSO                                                   | Page 14 |
| <b>S15</b> | <sup>13</sup> C NMR Spectrum of cyclic pentapeptide ( <b>9</b> ) in DMSO                                                  | Page 15 |
| <b>T1</b>  | <sup>1</sup> H and <sup>13</sup> C data for cyclic pentapeptide ( <b>9</b> ) in DMSO                                      | Page 16 |
| <b>S17</b> | <sup>1</sup> H NMR Spectrum of Eudistomide B epimers ( <b>2</b> , <b>12</b> ) in CDCl <sub>3</sub>                        | Page 17 |
| <b>S18</b> | HSQC Spectrum of Eudistomide B epimers ( <b>2</b> , <b>12</b> ) in CDCl <sub>3</sub>                                      | Page 18 |
| <b>S19</b> | <sup>1</sup> H NMR Spectrum of Eudistomide B acetate ester epimers ( <b>13</b> , <b>14</b> ) in CDCl <sub>3</sub>         | Page 19 |
| <b>S20</b> | HSQC Spectrum of Eudistomide B acetate ester epimers ( <b>13</b> , <b>14</b> ) in CDCl <sub>3</sub>                       | Page 20 |
| <b>S21</b> | <sup>1</sup> H NMR Spectrum of the lipase reaction products ( <b>2</b> , <b>13</b> , <b>14</b> ) in CDCl <sub>3</sub>     | Page 21 |
| <b>S22</b> | HSQC Spectrum of the lipase reaction products ( <b>2</b> , <b>13</b> , <b>14</b> ) in CDCl <sub>3</sub>                   | Page 22 |

## S2.

**General Experimental Procedures.** NMR data were collected using a 400 ( $^1\text{H}$  400 MHz,  $^{13}\text{C}$  100 MHz) NMR spectrometer equipped with a 5 mm probe, a 500 ( $^1\text{H}$  500 MHz,  $^{13}\text{C}$  125 MHz) NMR spectrometer with a 3 mm probe or a 600 ( $^1\text{H}$  600 MHz,  $^{13}\text{C}$  150 MHz) NMR spectrometer equipped with a 5 mm  $^1\text{H}$  [ $^{13}\text{C}$ ,  $^{15}\text{N}$ ] triple resonance cold probe with a z-axis gradient, all referenced to residual solvent. High-resolution ESIMS analyses were performed on either a LTQ-FT or a Q-tof micro. IR spectra were recorded on NaCl disks in a FT-IR spectrometer.

**Eudistomide B Acetate Ester Epimers (13, 14).** 50  $\mu\text{L}$  of  $\text{Ac}_2\text{O}$  (0.53 mmol) was added to a solution of the eudistomide B alcohol epimers (**2**, **12**) (1.1 mg, 1.4  $\mu\text{mol}$ ) in 150  $\mu\text{L}$  of dry pyridine (1.85 mmol). The reaction vial was flushed with argon, sealed, and allowed to stir overnight.  $\text{CH}_2\text{Cl}_2$  was added to the reaction and subsequently dried under argon. Analysis of the  $^1\text{H}$  NMR spectra and HSQC of the C-35 acetoxy epimers (**13**, **14**) indicated a quantitative yield for the reaction.

**Enantioselective Lipase-Catalyzed Hydrolysis.** The acetate ester epimers (**13**, **14**) (1.2 mg, 1.4  $\mu\text{mol}$ ) were dissolved in a minimal amount of isopropanol (25  $\mu\text{L}$ ). 120  $\mu\text{g}$  of lipase B from *Candida antarctica* (~9 units/mg) dissolved in 100  $\mu\text{L}$  of 1X PBS (pH = 7.4) was added to the epimer solution, and the solution was allowed to stir overnight at 37  $^\circ\text{C}$ . The solution was extracted with  $\text{CH}_2\text{Cl}_2$ , and dried under argon. The  $^1\text{H}$  NMR and HSQC indicate the presence of one alcohol (**2**; 35*R*) and unreacted acetate esters (**13**, **14**).

# S3 $^1\text{H}$ NMR Spectrum of Eudistomide A (1) in $\text{CDCl}_3$

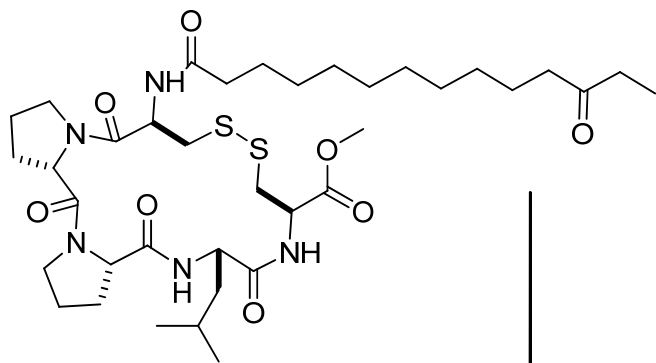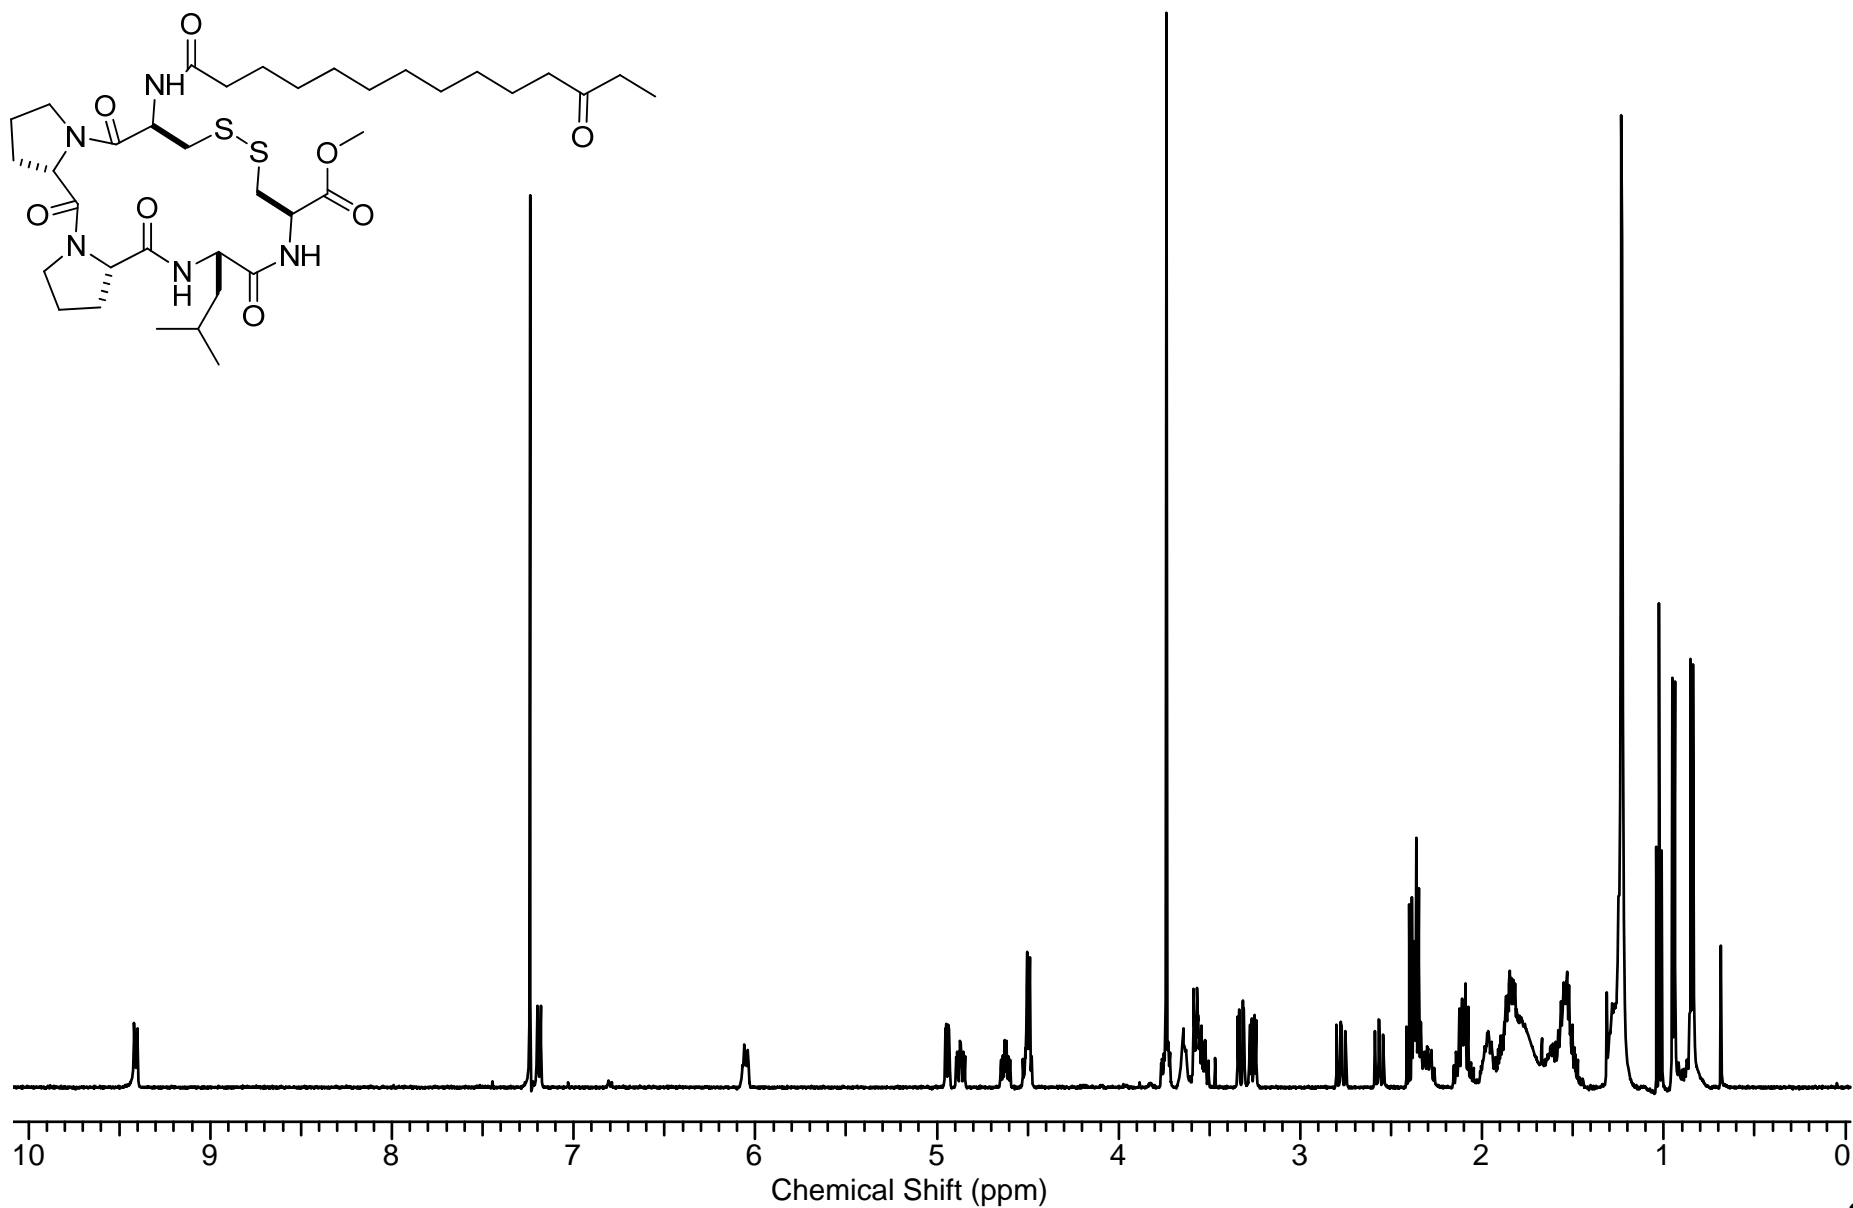

# S4 $^{13}\text{C}$ NMR Spectrum of Eudistomide A (1) in $\text{CDCl}_3$

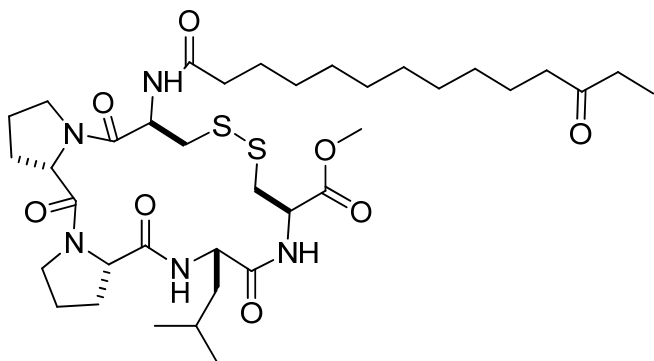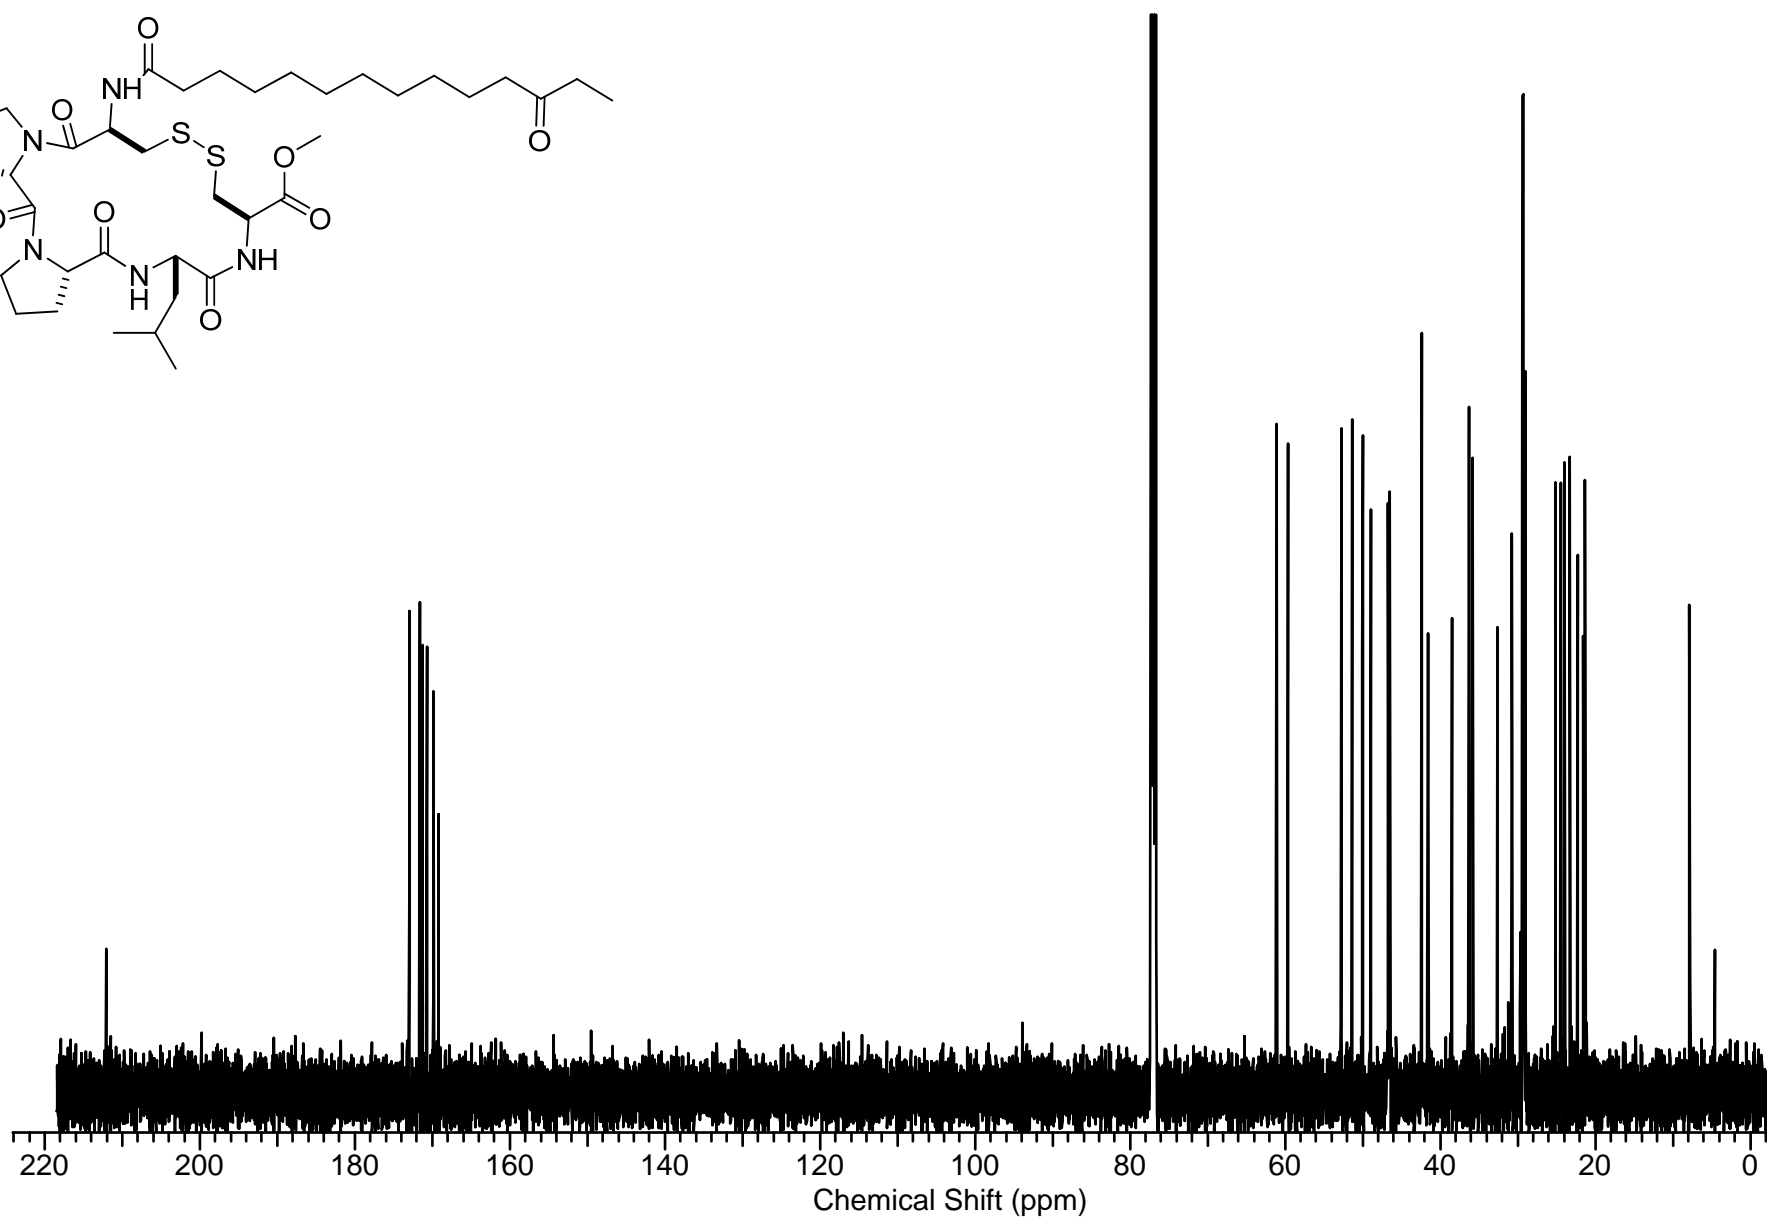



S6  $^1\text{H}$  NMR Spectrum of 12-(*tert*-butyldimethylsilyloxy)dodecan-1-ol (**5**) in  $\text{CD}_3\text{OD}$

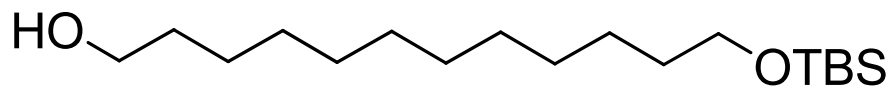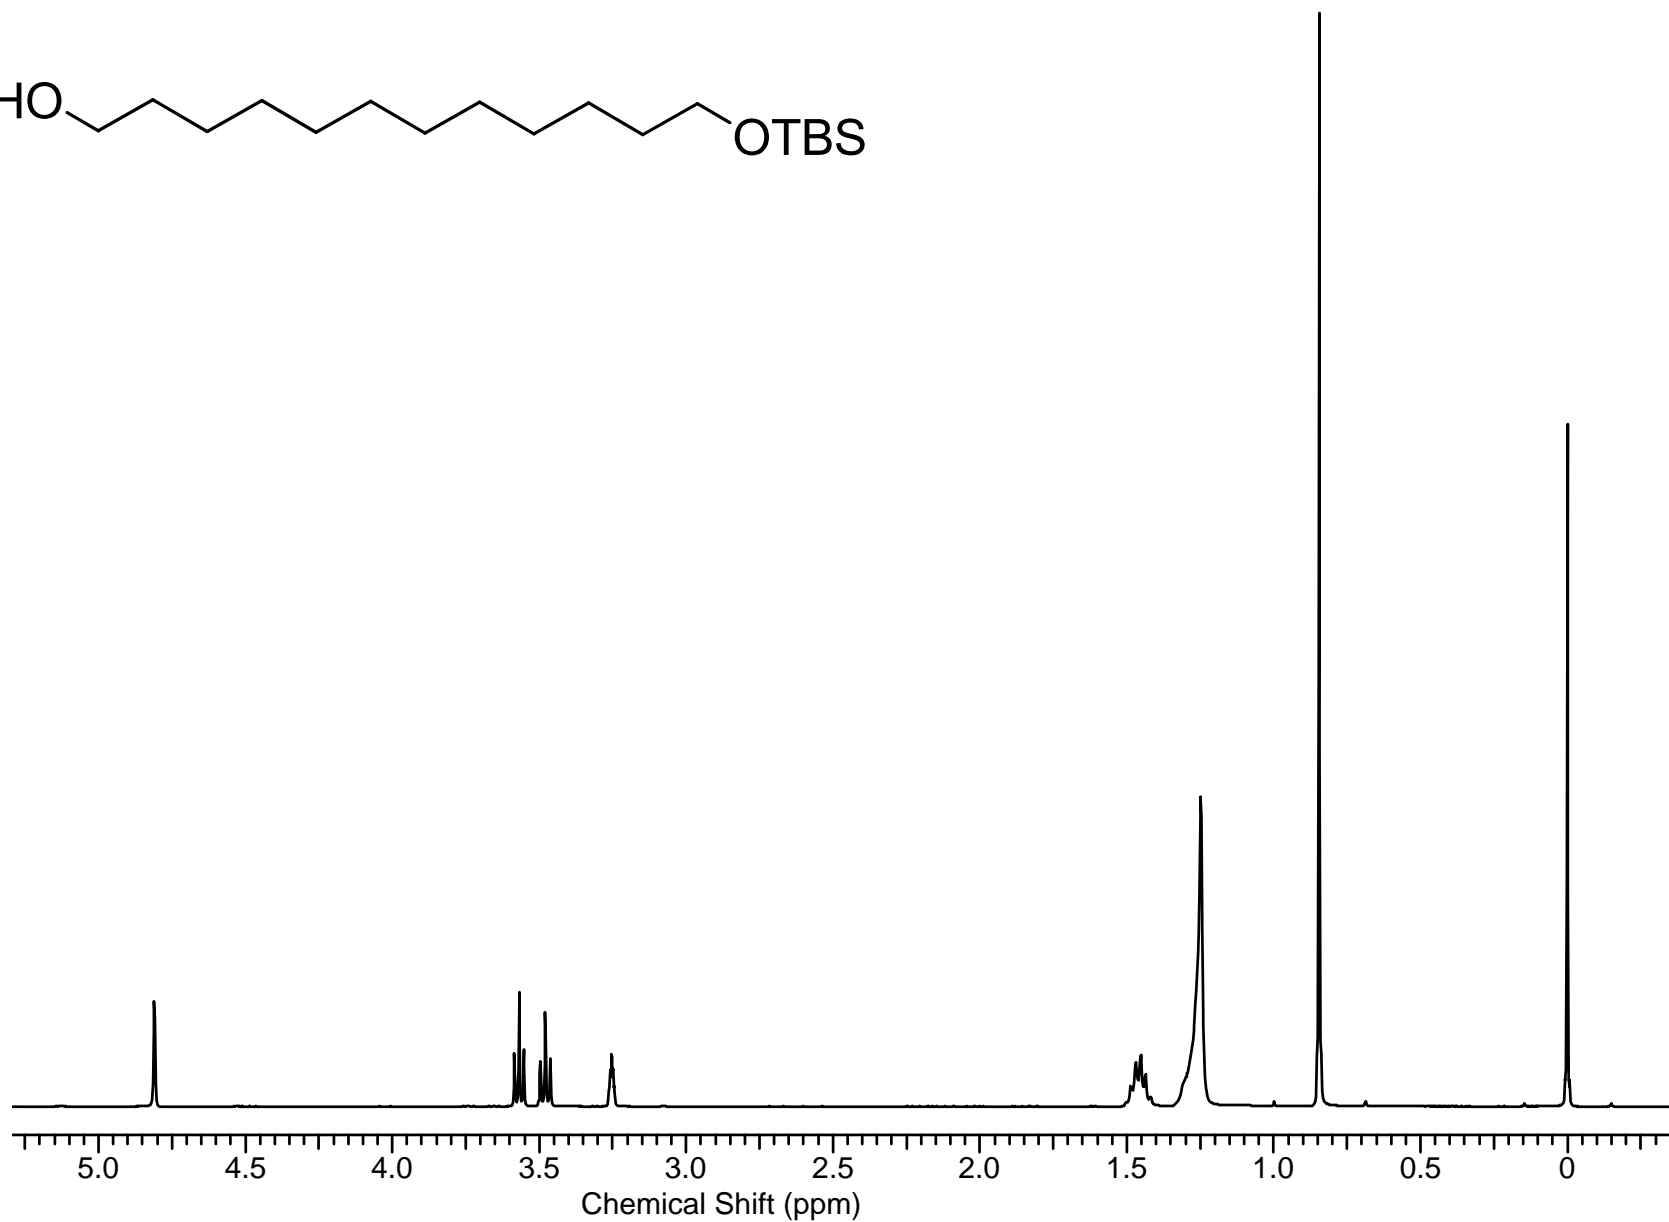

S7  $^{13}\text{C}$  NMR Spectrum of 12-(*tert*-butyldimethylsilyloxy)dodecan-1-ol (**5**) in  $\text{CD}_3\text{OD}$

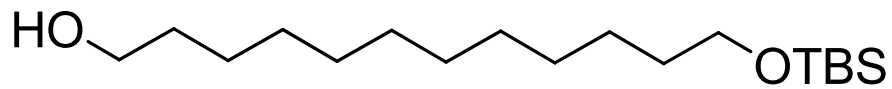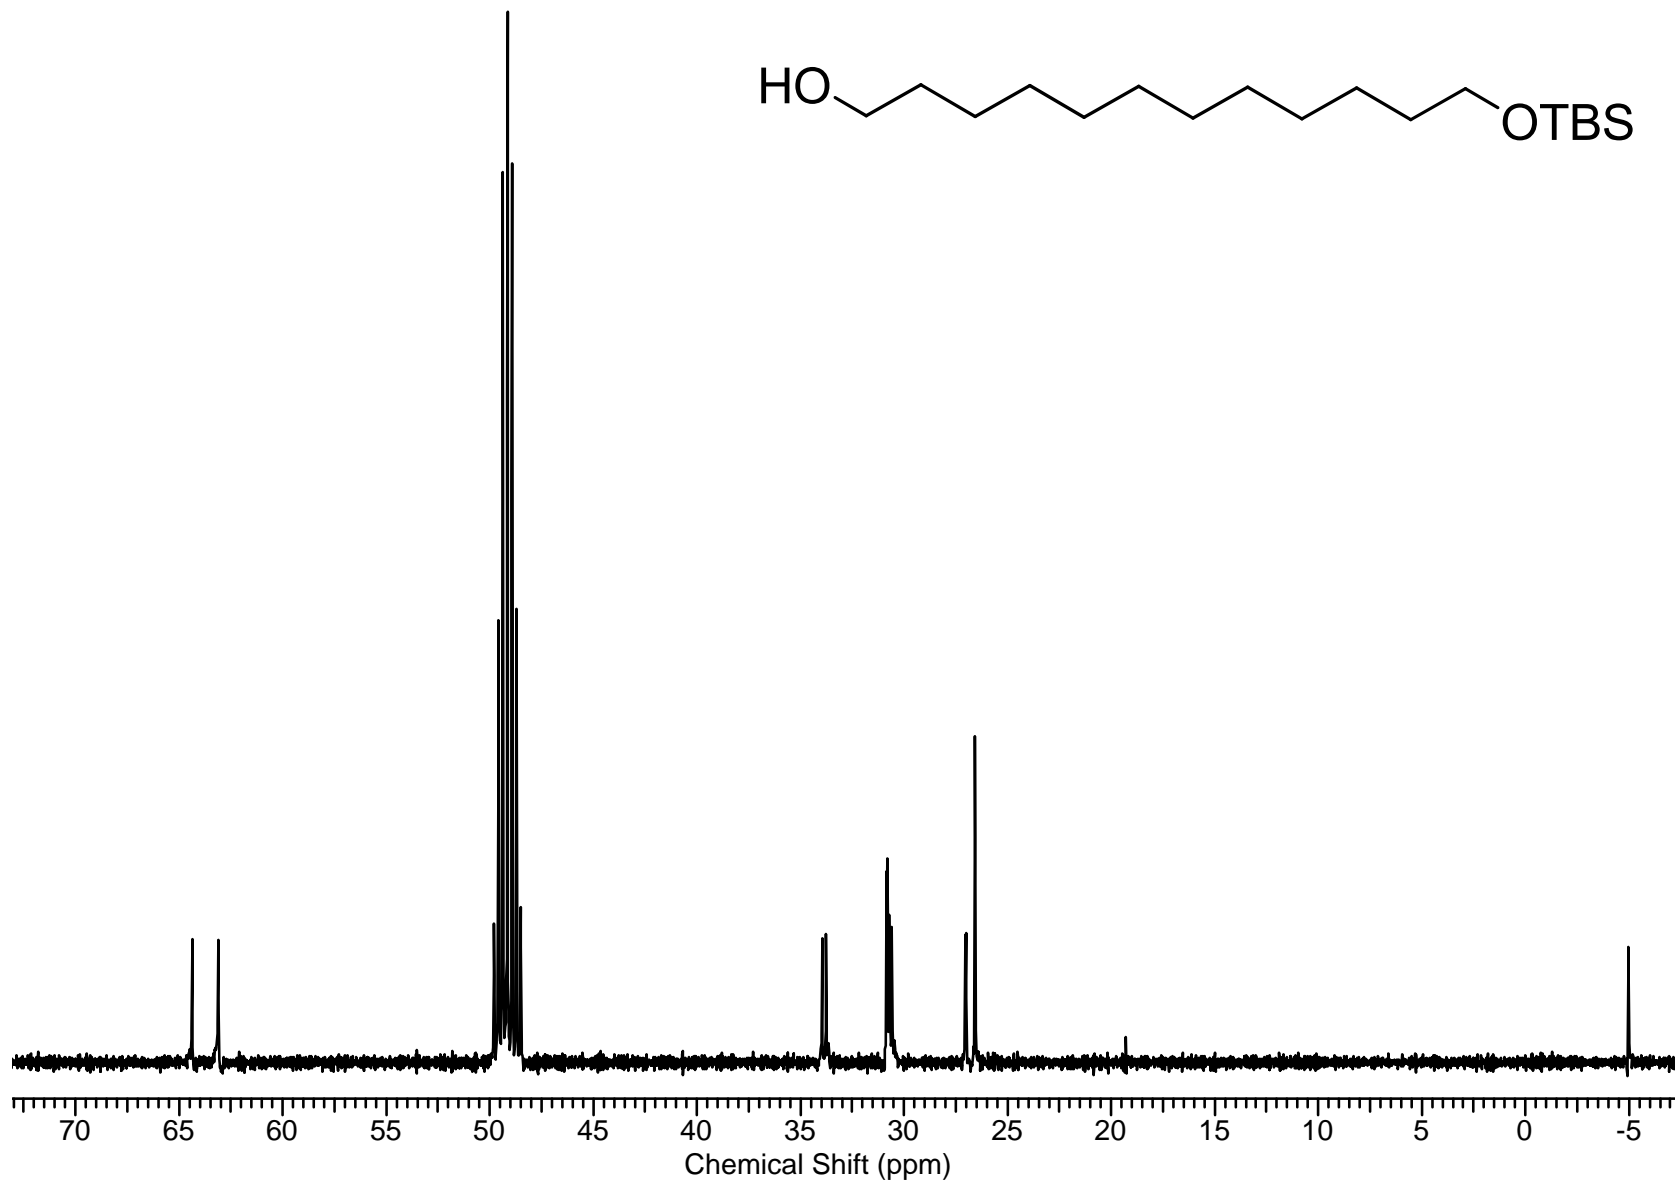

# S8 $^1\text{H}$ NMR Spectrum of 14-(*tert*-butyldimethylsilyloxy)tetradecan-3-ol (**6**) in $\text{CDCl}_3$

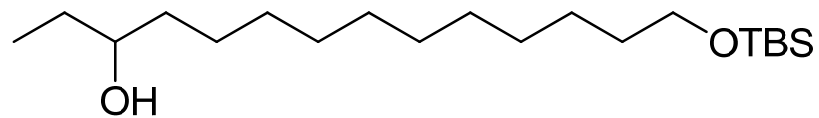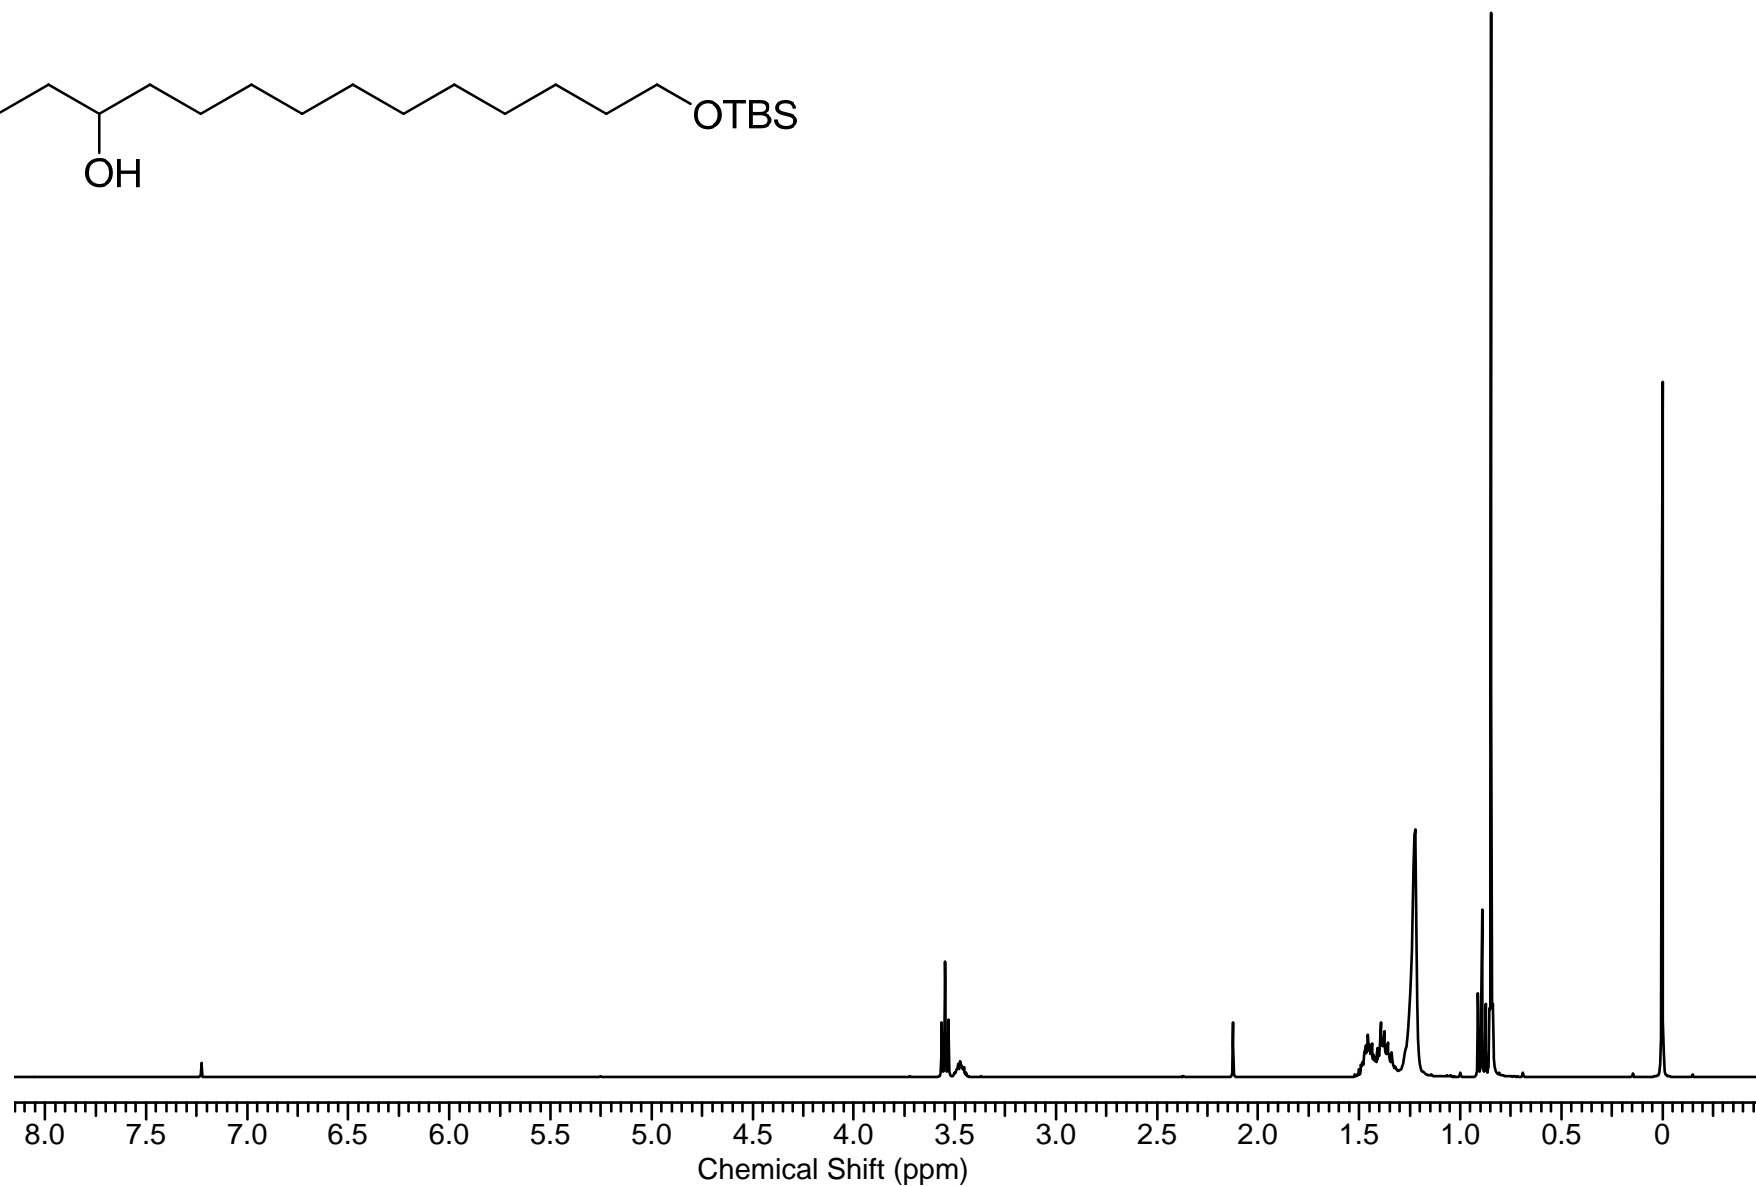



# S9 <sup>13</sup>C NMR Spectrum of 14-(*tert*-butyldimethylsilyloxy)tetradecan-3-ol (**6**) in CDCl<sub>3</sub>

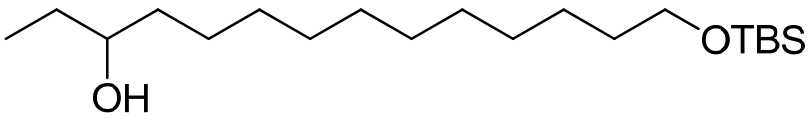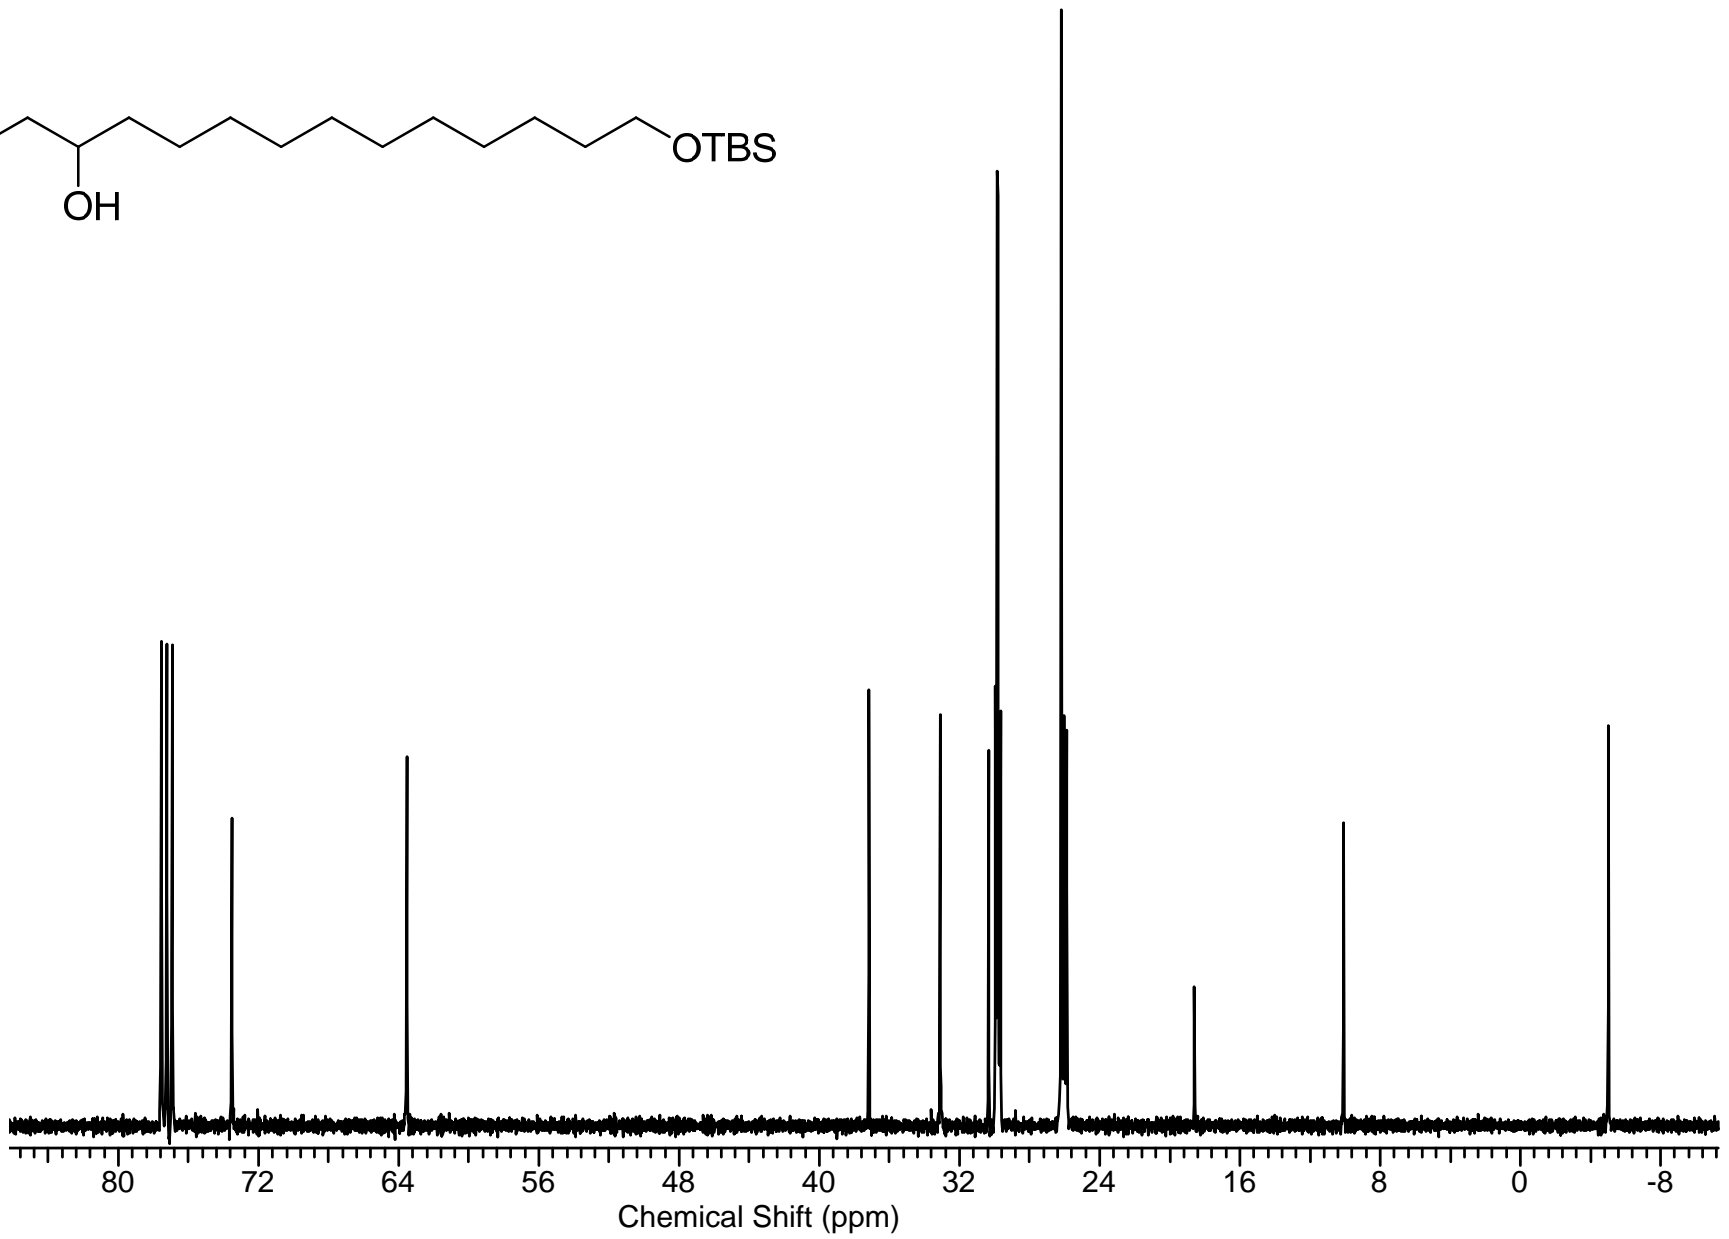

# S10 $^1\text{H}$ NMR Spectrum of tetradecane-1,12-diol (**7**) in $\text{CDCl}_3$

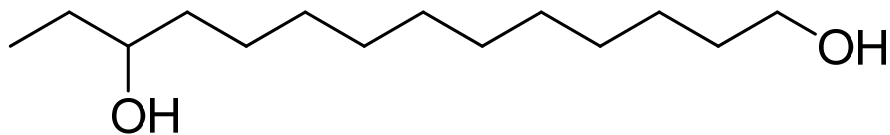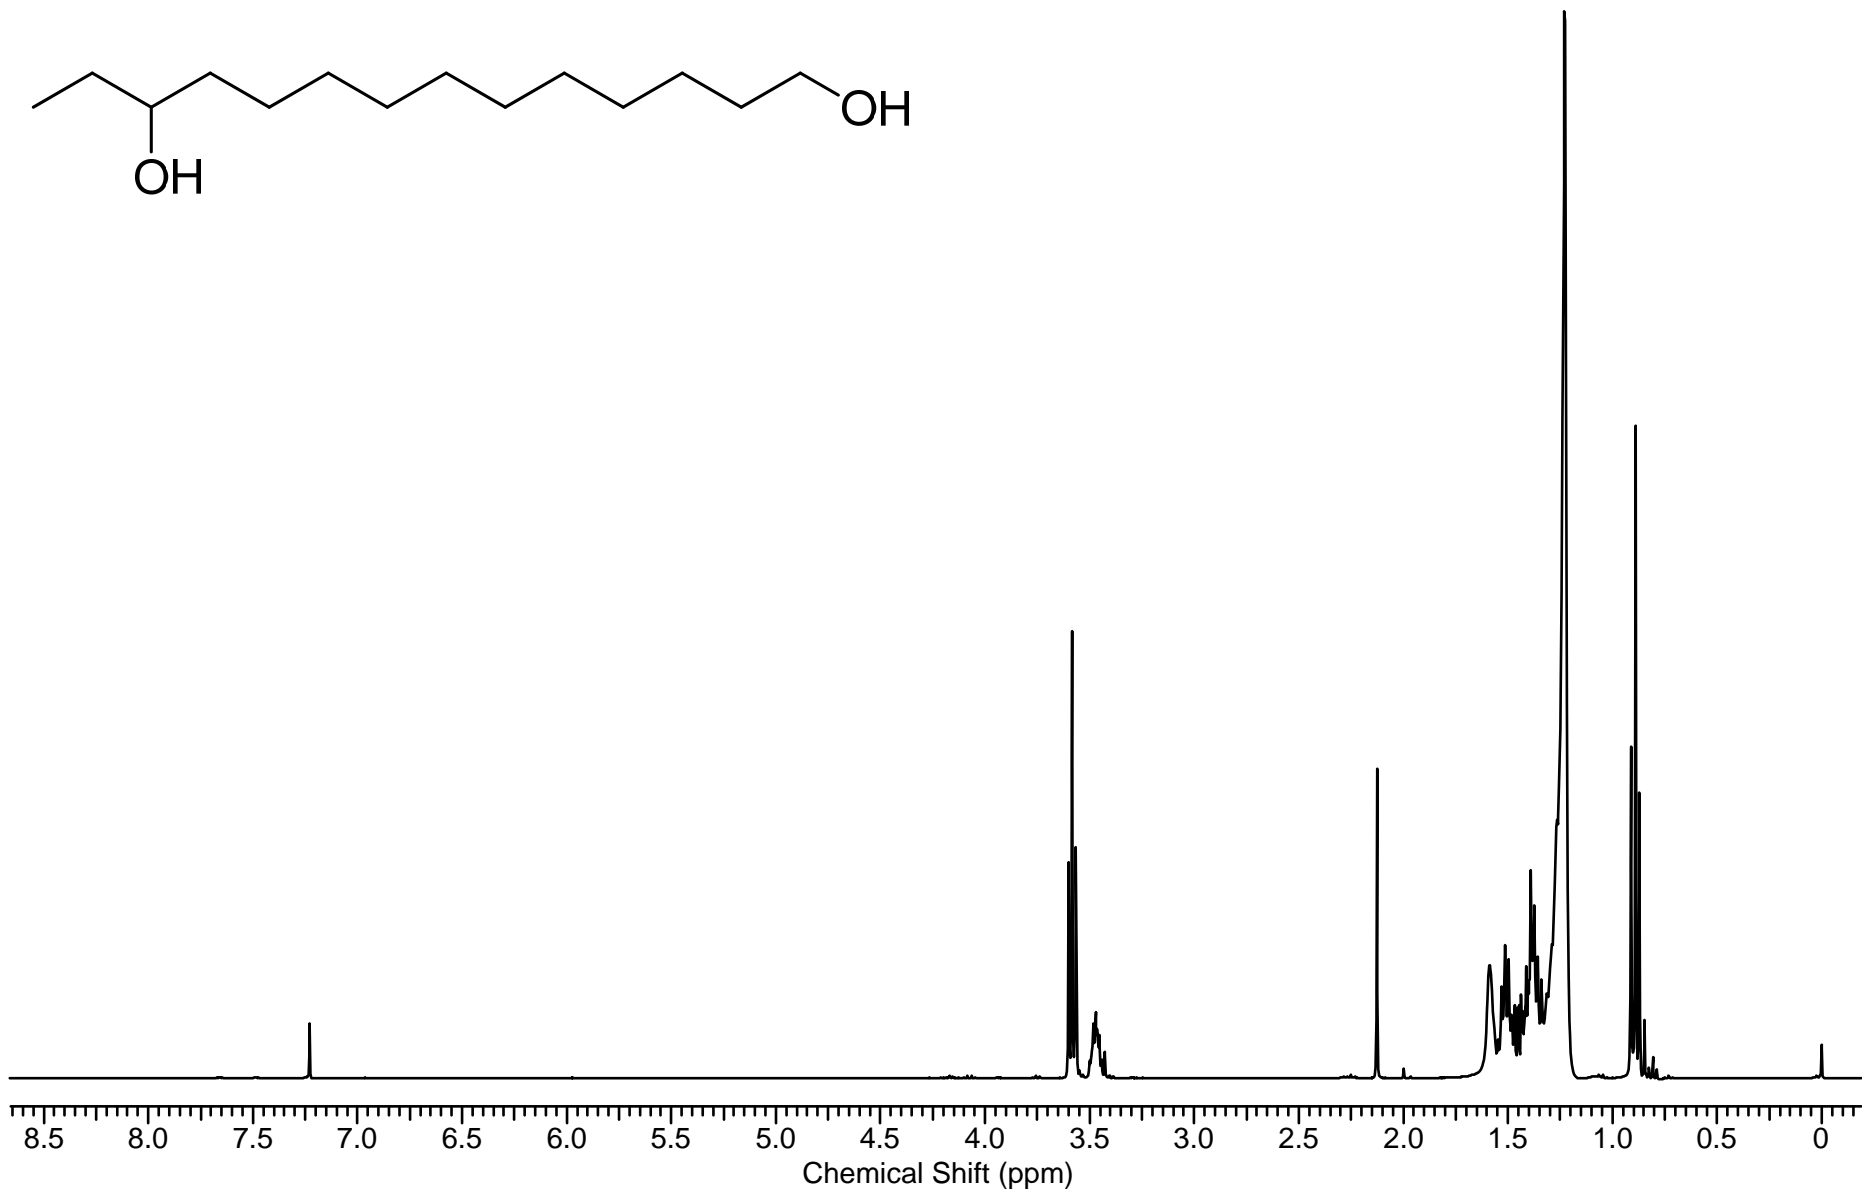

# S11 $^{13}\text{C}$ NMR Spectrum of tetradecane-1,12-diol (**7**) in $\text{CDCl}_3$

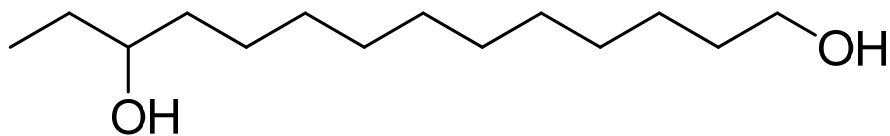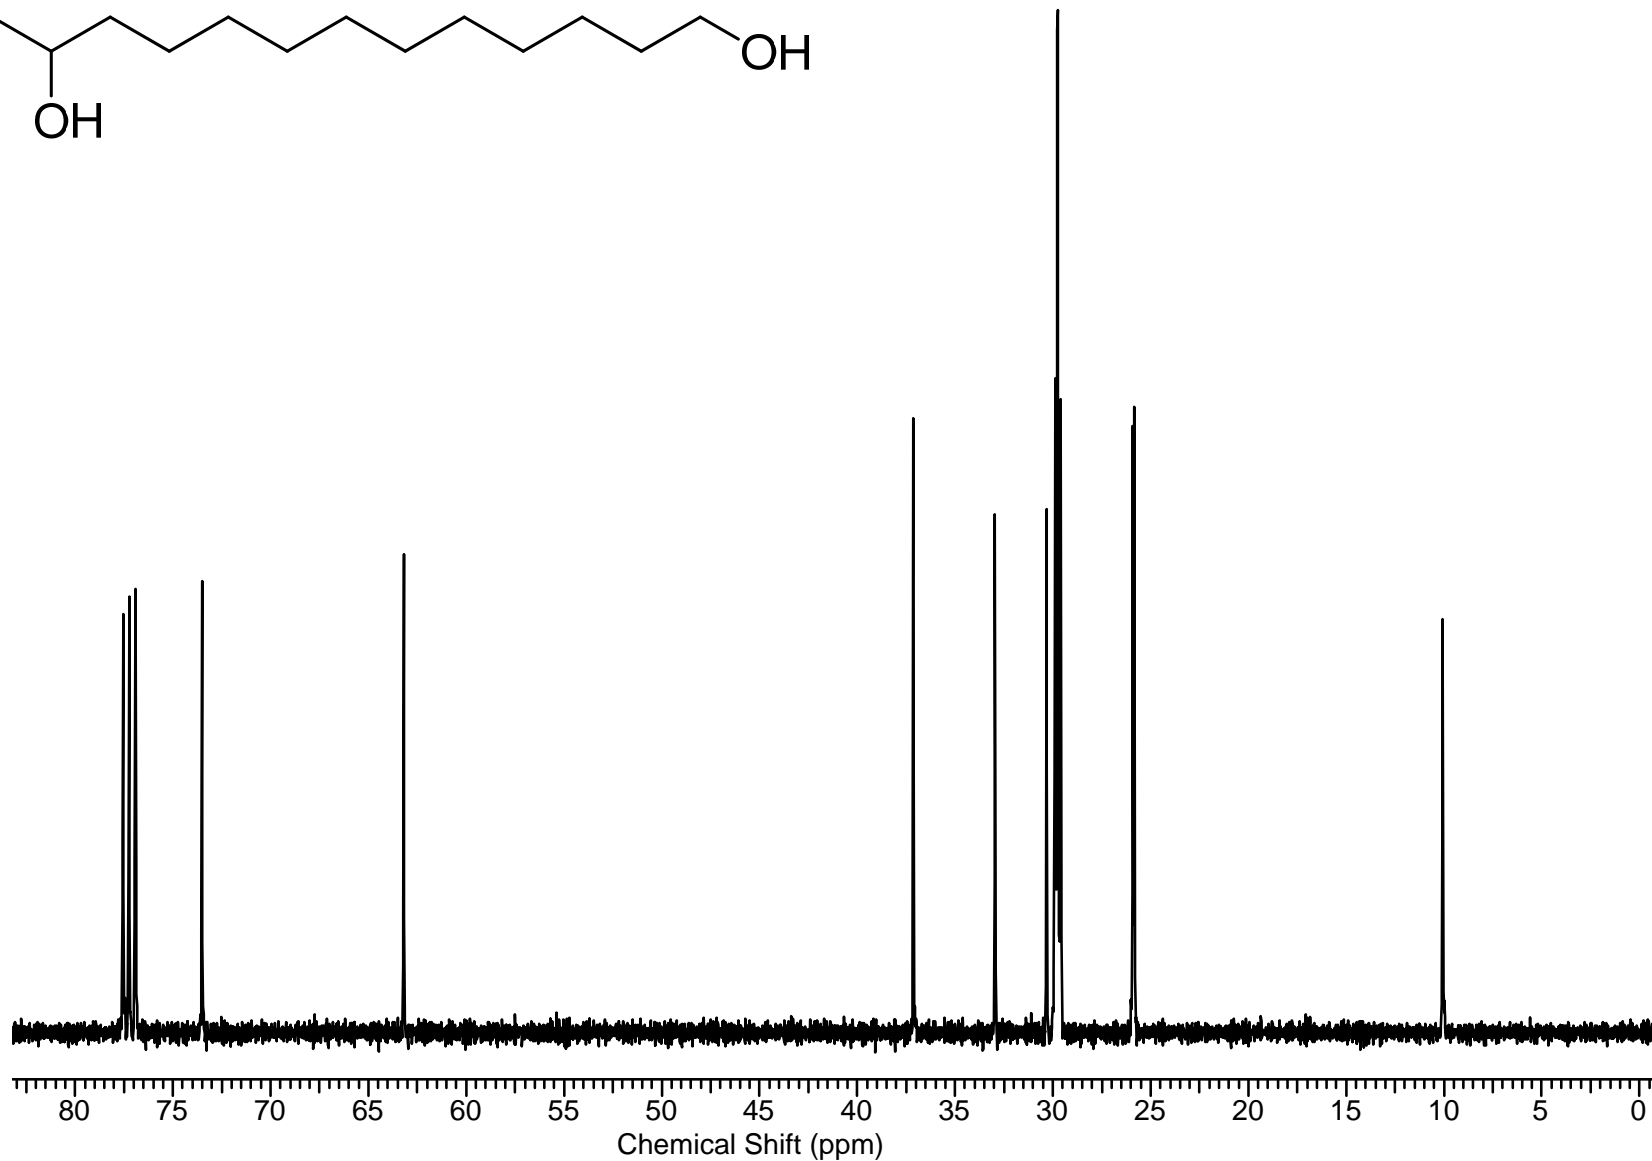

# S12 $^1\text{H}$ NMR Spectrum of 12-oxo-tetradecanoic acid (**8**) in $\text{CDCl}_3$

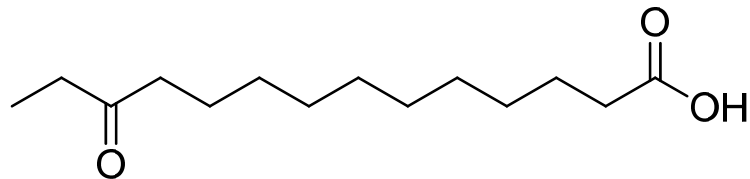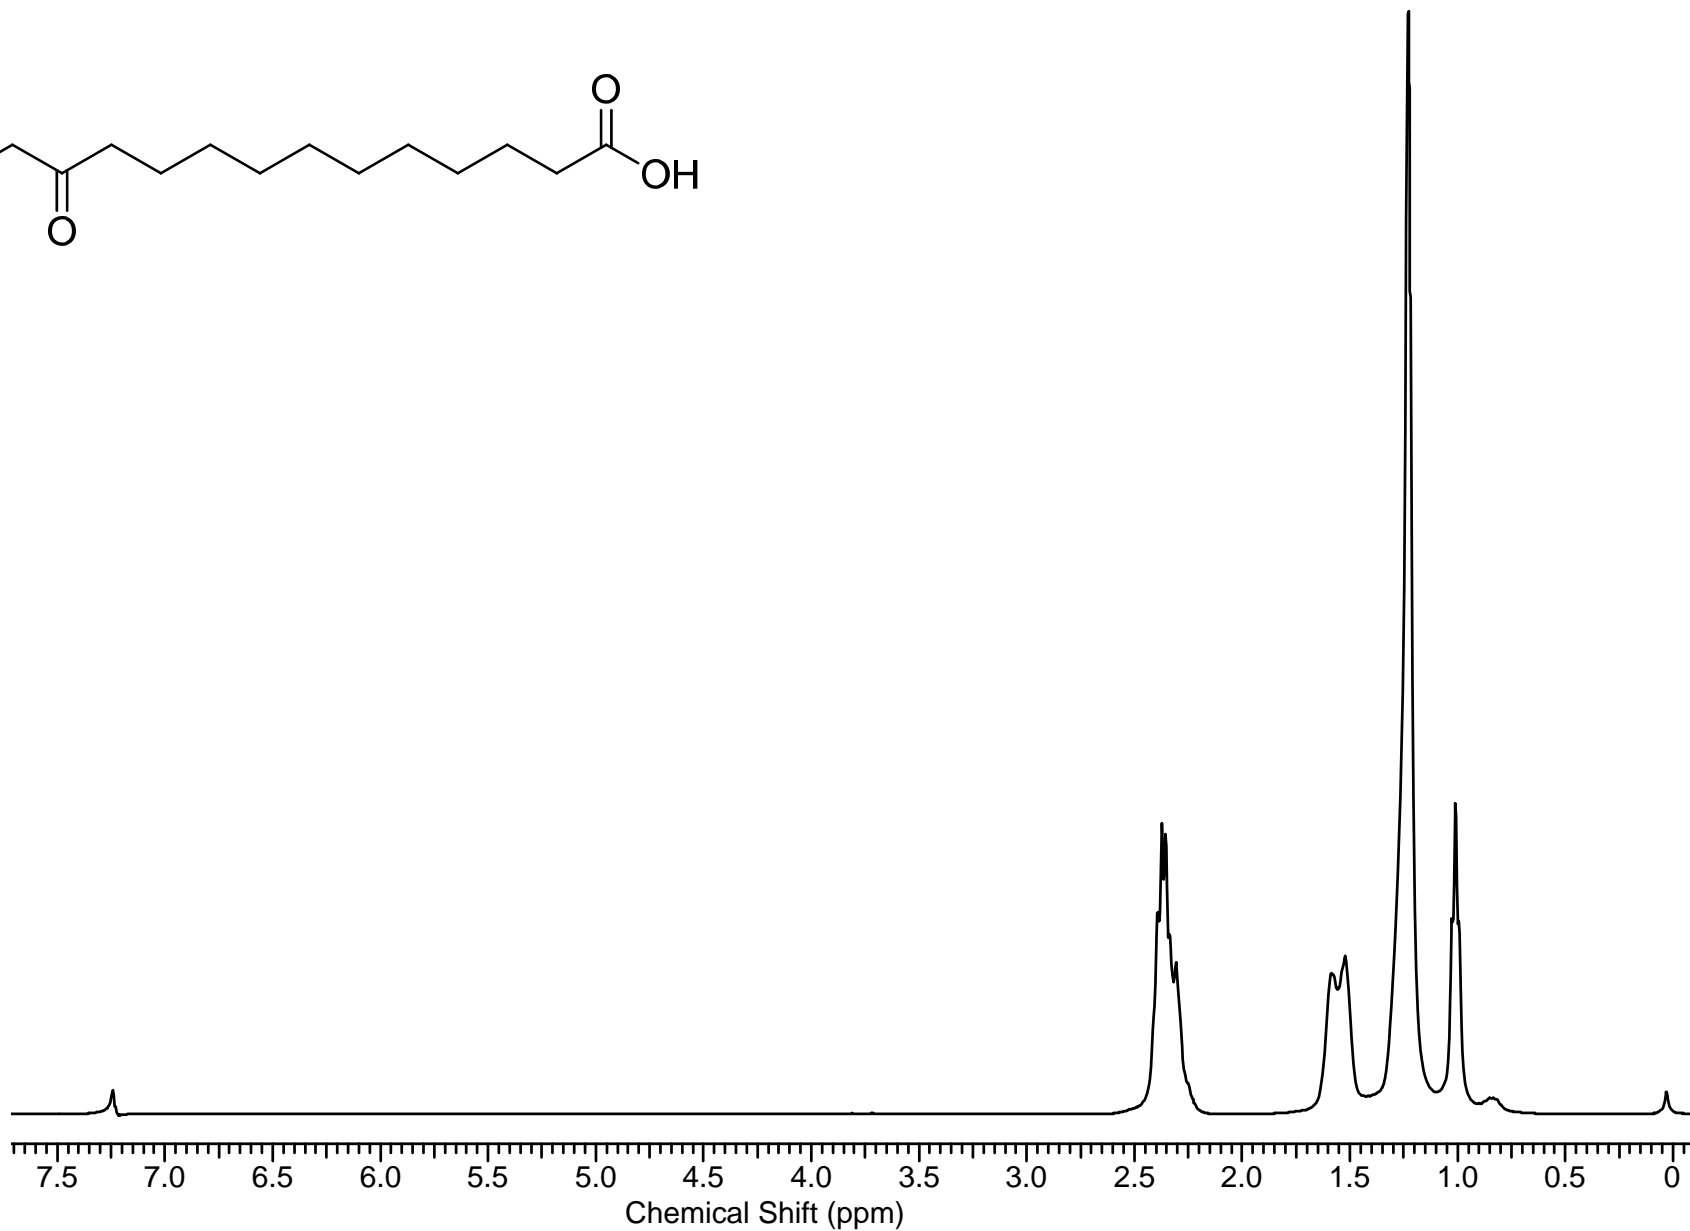

# S13 $^{13}\text{C}$ NMR Spectrum of 12-oxo-tetradecanoic acid (**8**) in $\text{CDCl}_3$

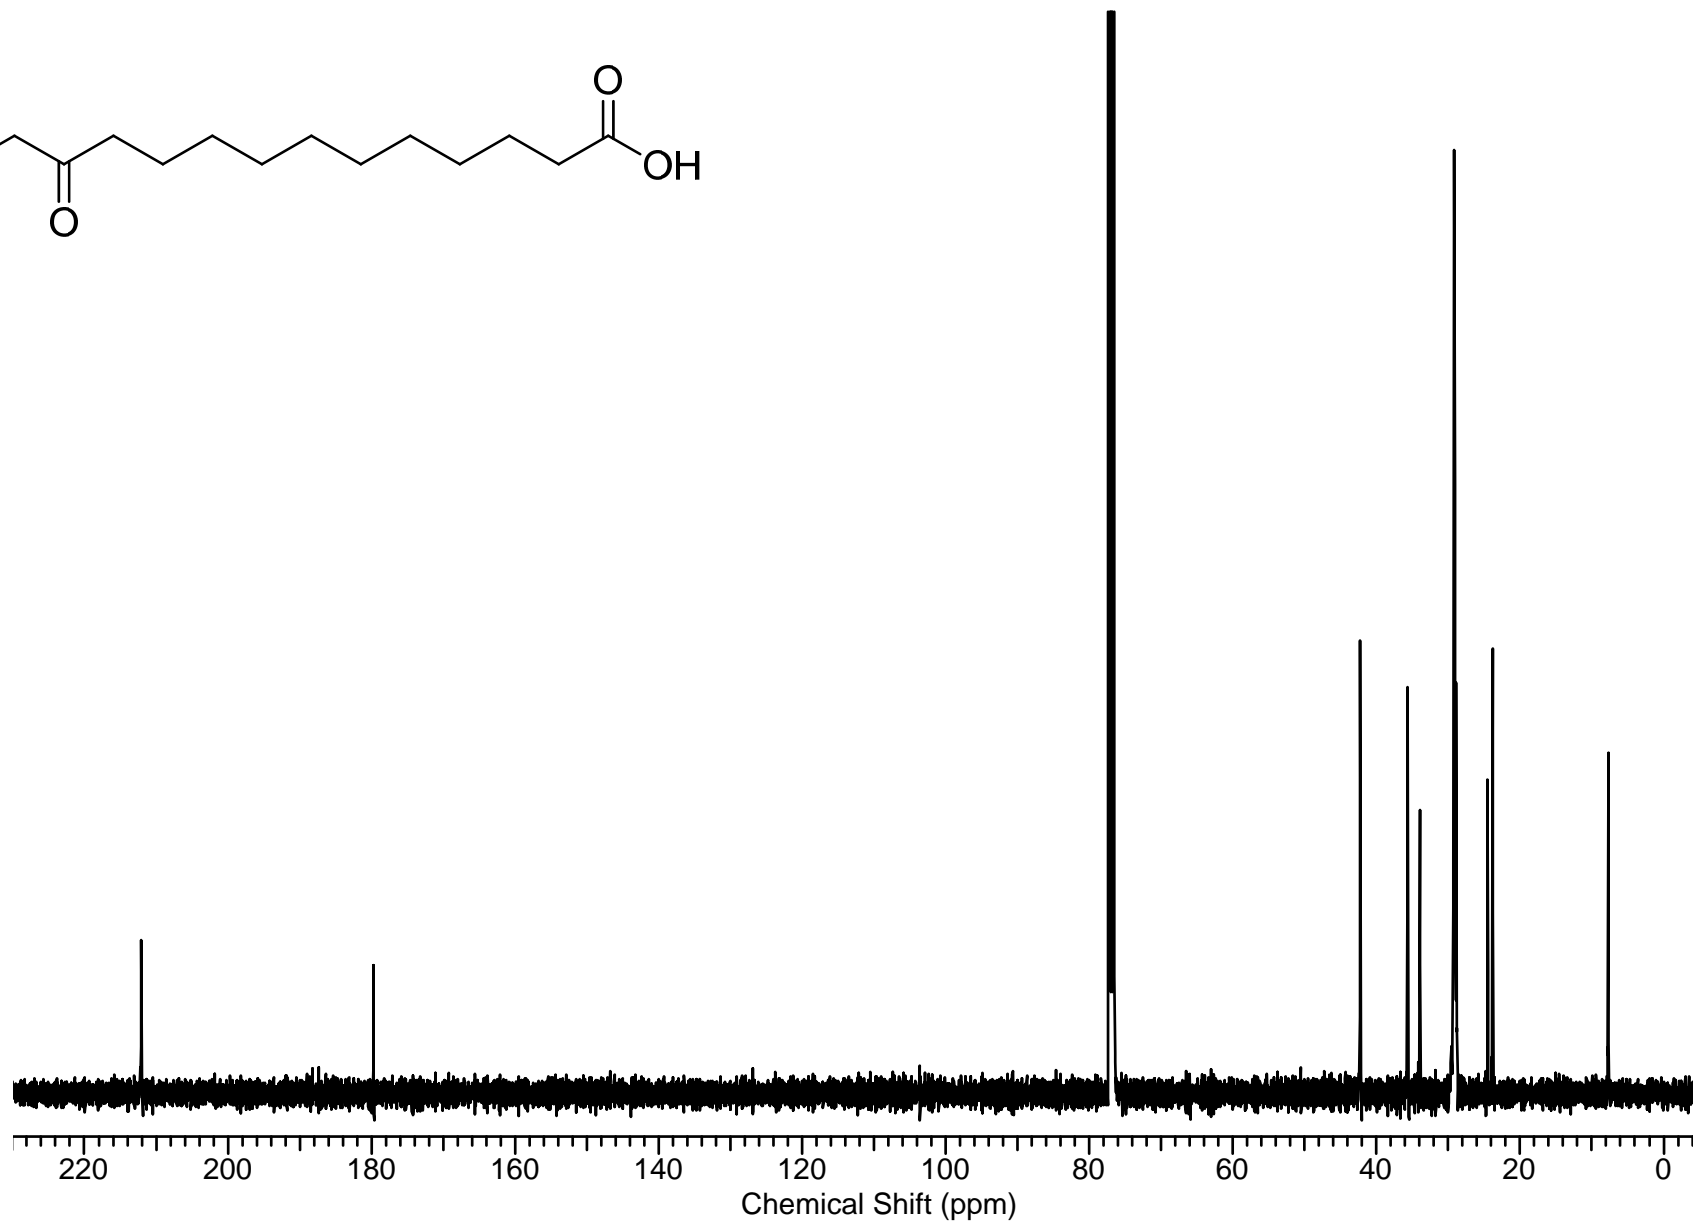

# S14 $^1\text{H}$ NMR Spectrum of cyclic pentapeptide (**9**) in $\text{DMSO-d}_6$

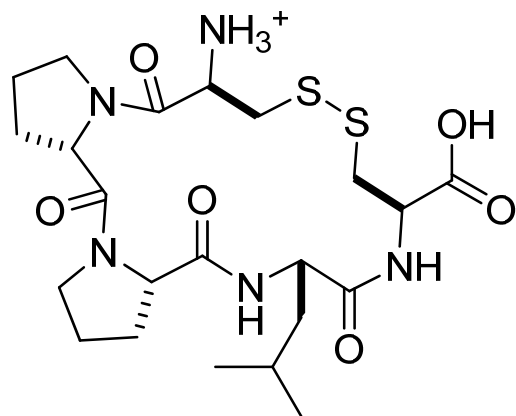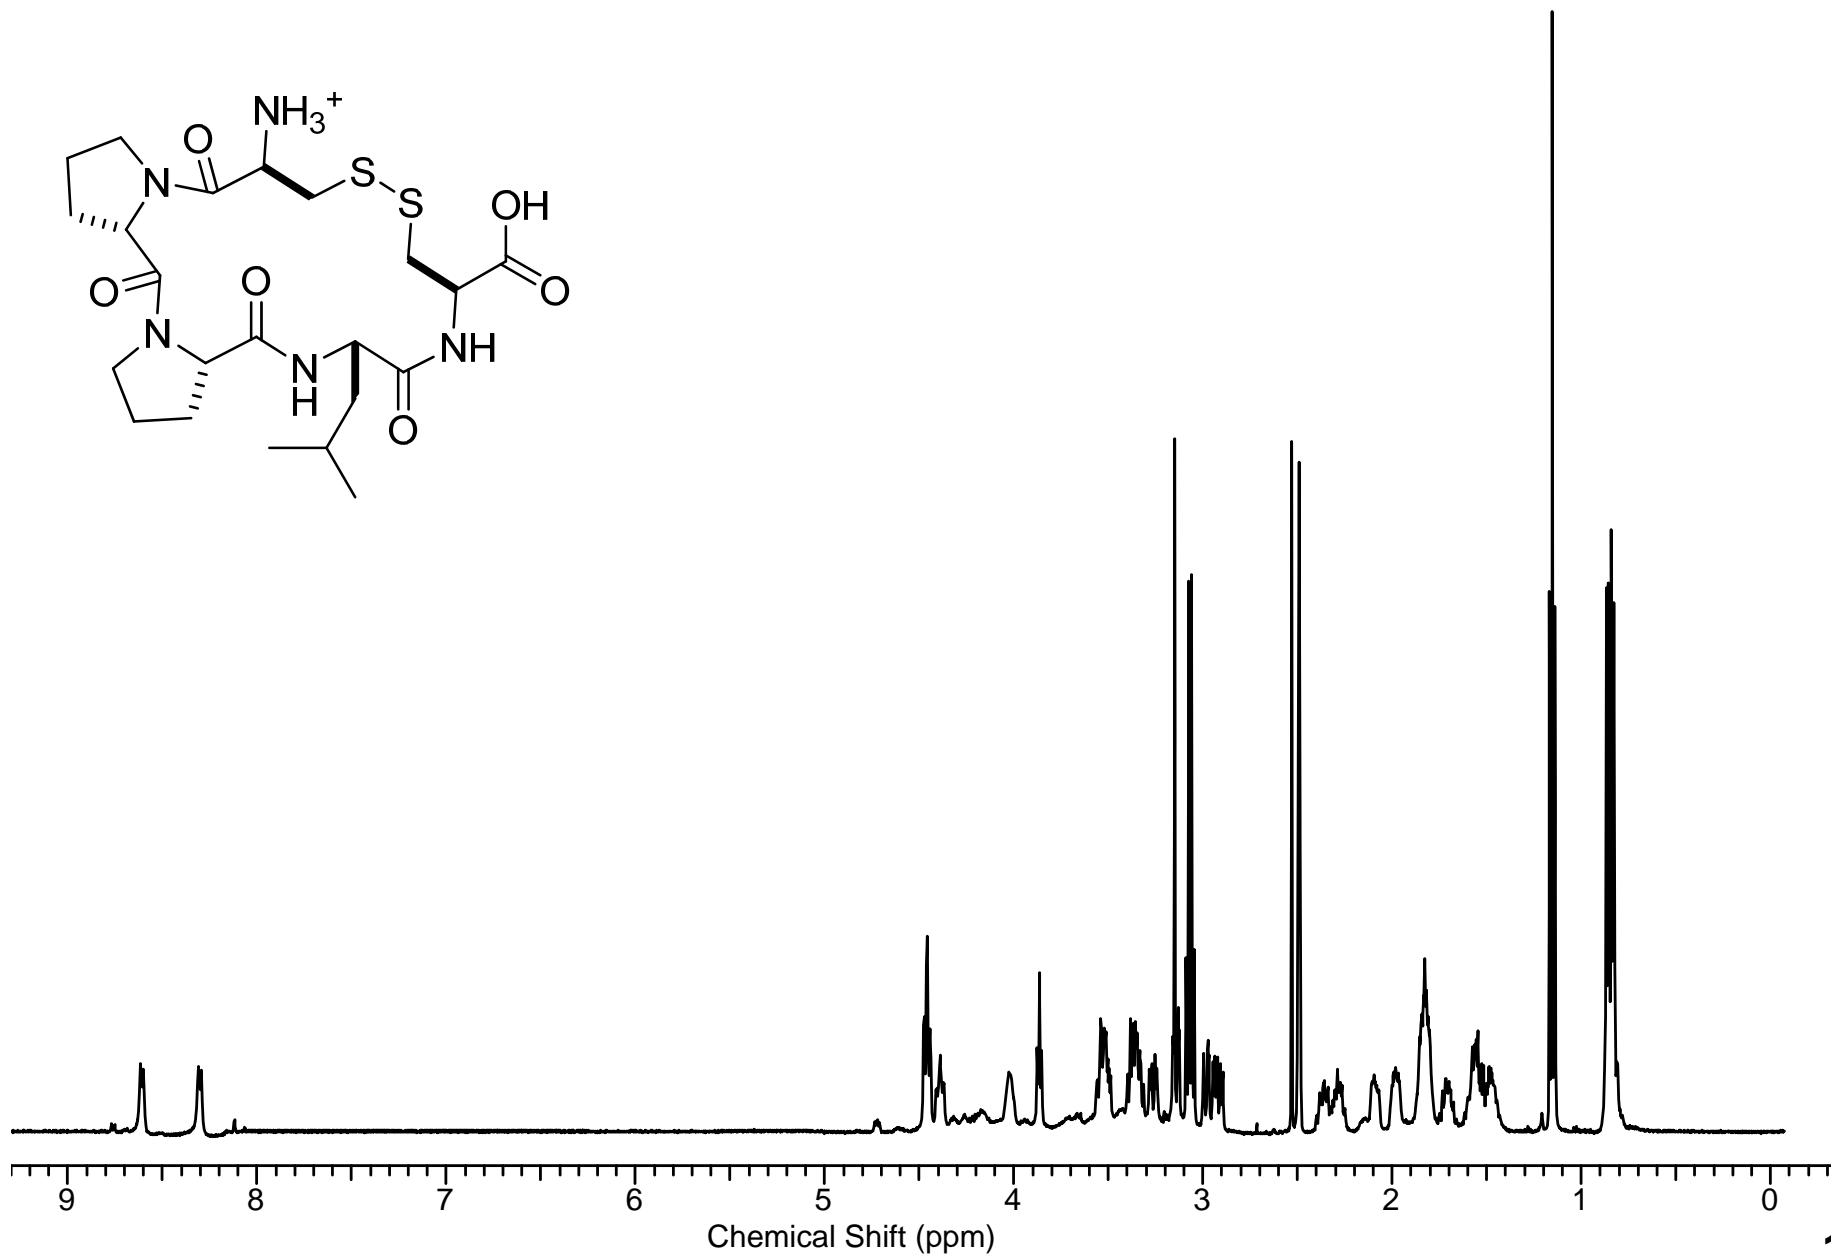

# S15 $^{13}\text{C}$ NMR Spectrum of cyclic pentapeptide (**9**) in $\text{DMSO-d}_6$

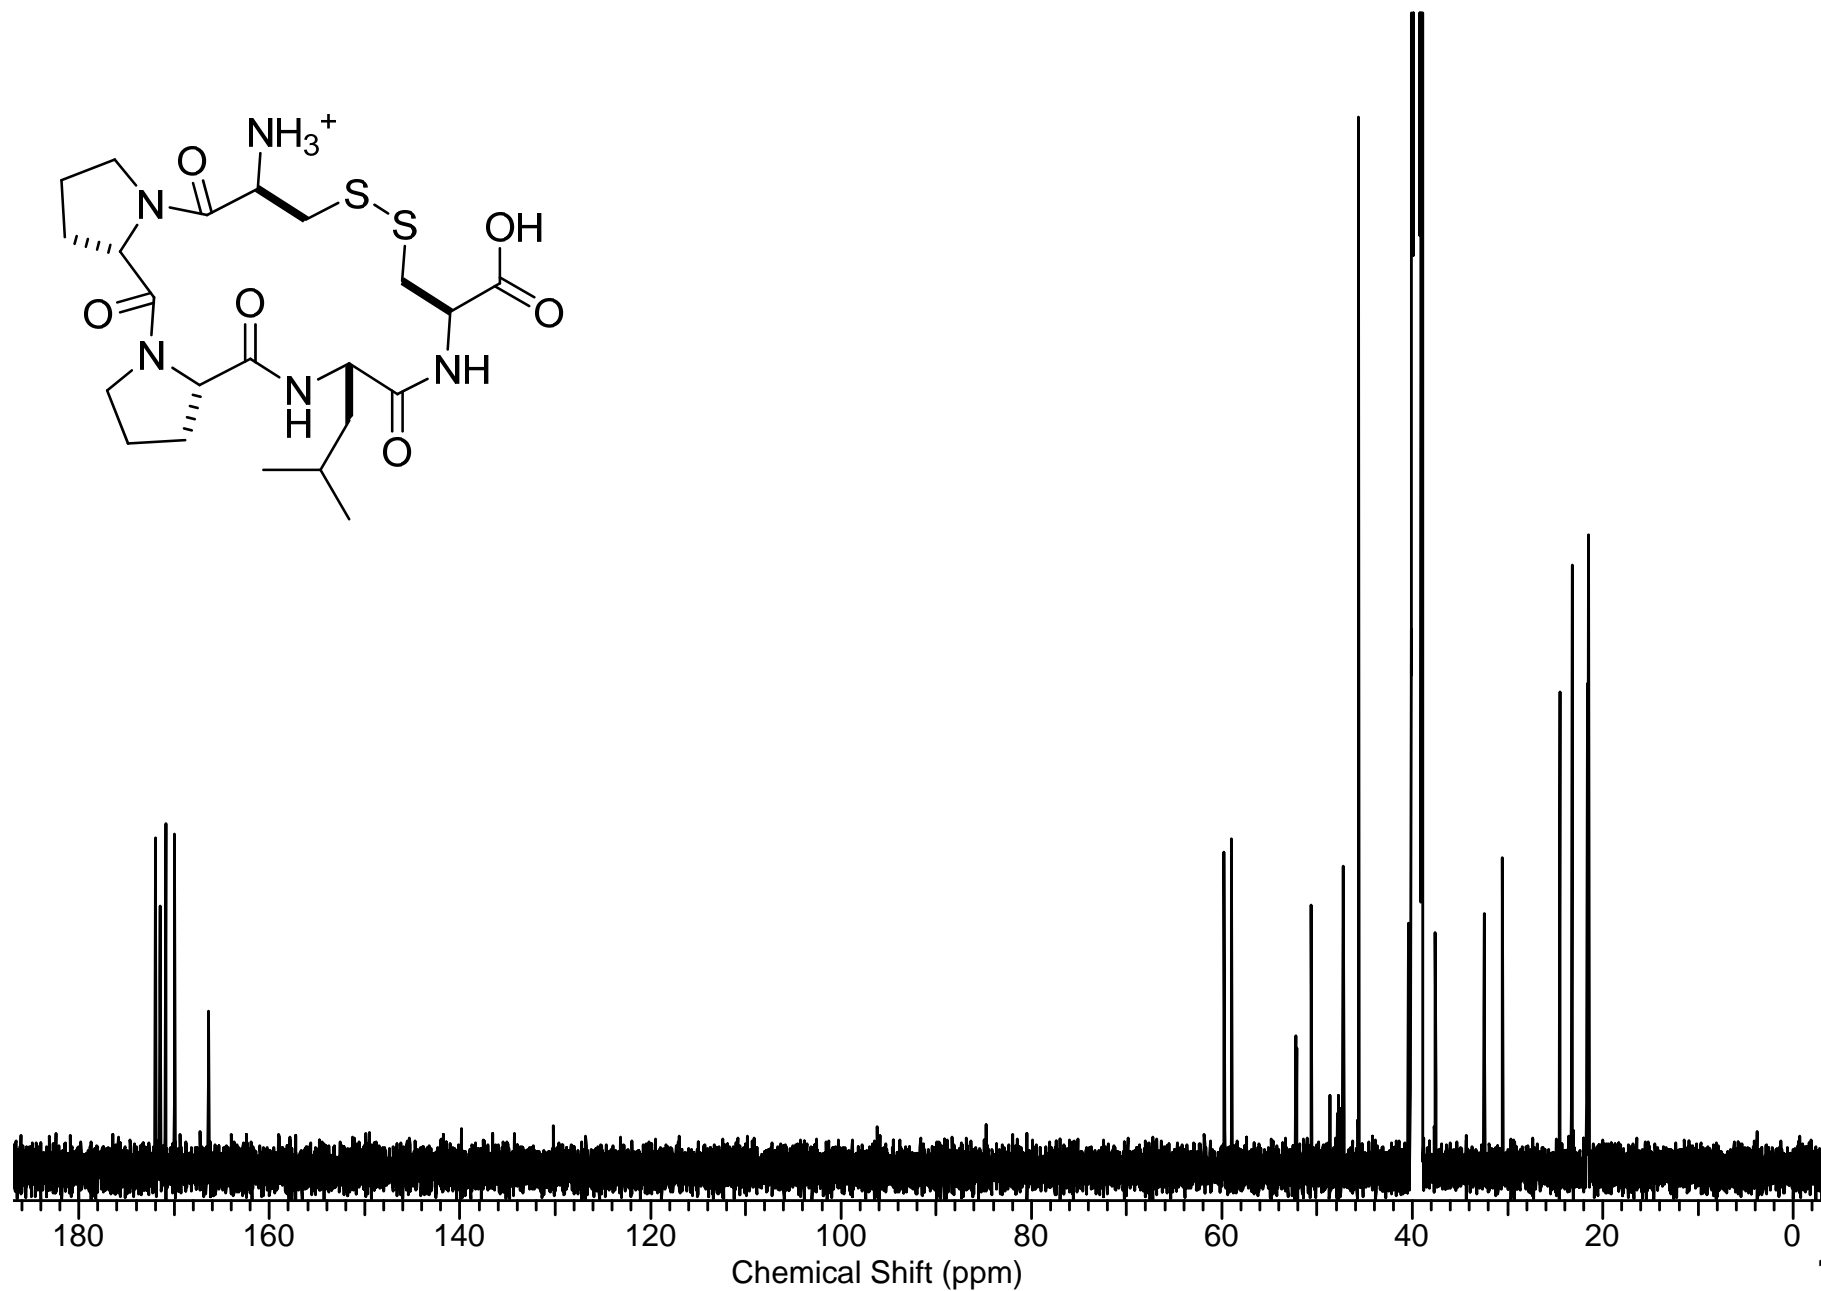

**Supplemental Table 1.** NMR data for the cyclic pentapeptide (**9**) (500 MHz, DMSO-d<sub>6</sub>)

| Cyclic pentapeptide ( <b>9</b> ) |                      |                                           |                     |       |
|----------------------------------|----------------------|-------------------------------------------|---------------------|-------|
|                                  | position             | $\delta_{\text{H}}$ mult ( <i>J</i> , Hz) | $\delta_{\text{C}}$ |       |
| Cys-1                            | 1                    | —                                         | 171.9               |       |
|                                  | 2                    | 4.38, ddd (11.1, 7.5, 2.9)                | 51.9                |       |
|                                  | 3                    | 3.14, dd (13.8, 2.9)                      | 41.9                |       |
|                                  |                      | 2.96, dd (13.8, 11.1)                     |                     |       |
|                                  | NH                   | 8.30, br d (7.5)                          | —                   |       |
| Leu                              | 4                    | —                                         | 171.5               |       |
|                                  | 5                    | 4.02, m                                   | 52.0                |       |
|                                  | 6                    | 1.83, <sup>a</sup> m                      | 37.3                |       |
|                                  |                      | 1.55, <sup>a</sup> m                      |                     |       |
|                                  | 7                    | 1.48, m                                   | 24.3                |       |
|                                  | 8                    | 0.85, d (6.5)                             | 21.3                |       |
|                                  | 9                    | 0.87, d (6.5)                             | 23.0                |       |
|                                  |                      | NH                                        | 8.61, br d (7.2)    | —     |
|                                  | Pro-1                | 10                                        | —                   | 171.0 |
| 11                               |                      | 4.48, <sup>a</sup> m                      | 59.5                |       |
| 12                               |                      | 2.30, m                                   | 32.3                |       |
|                                  |                      | 2.10, m                                   |                     |       |
| 13                               |                      | 1.83, <sup>a</sup> m                      | 21.7                |       |
|                                  |                      | 1.57, <sup>a</sup> m                      |                     |       |
| 14                               | 3.52, <sup>a</sup> m | 47.0                                      |                     |       |
|                                  | 3.34, <sup>a</sup> m |                                           |                     |       |
| Pro-2                            | 15                   | —                                         | 170.0               |       |
|                                  | 16                   | 4.46, <sup>a</sup> m                      | 58.8                |       |
|                                  | 17                   | 2.38, m                                   | 30.5                |       |
|                                  |                      | 1.99, m                                   |                     |       |
|                                  | 18                   | 1.72, m                                   | 21.6                |       |
|                                  | 19                   | 3.49, <sup>a</sup> m                      | 47.0                |       |
| 3.37, <sup>a</sup> m             |                      |                                           |                     |       |
| Cys-2                            | 20                   | —                                         | 166.4               |       |
|                                  | 21                   | 3.88, br t (5.7)                          | 50.4                |       |
|                                  | 22                   | 3.24, dd (14.5, 5.7)                      | 39.4                |       |
|                                  |                      | 2.91, dd (14.5, 5.7)                      |                     |       |

<sup>a</sup> Signals overlapped.



# S17 $^1\text{H}$ NMR Spectrum of Eudistomide B epimers (**2**, **12**) in $\text{CDCl}_3$

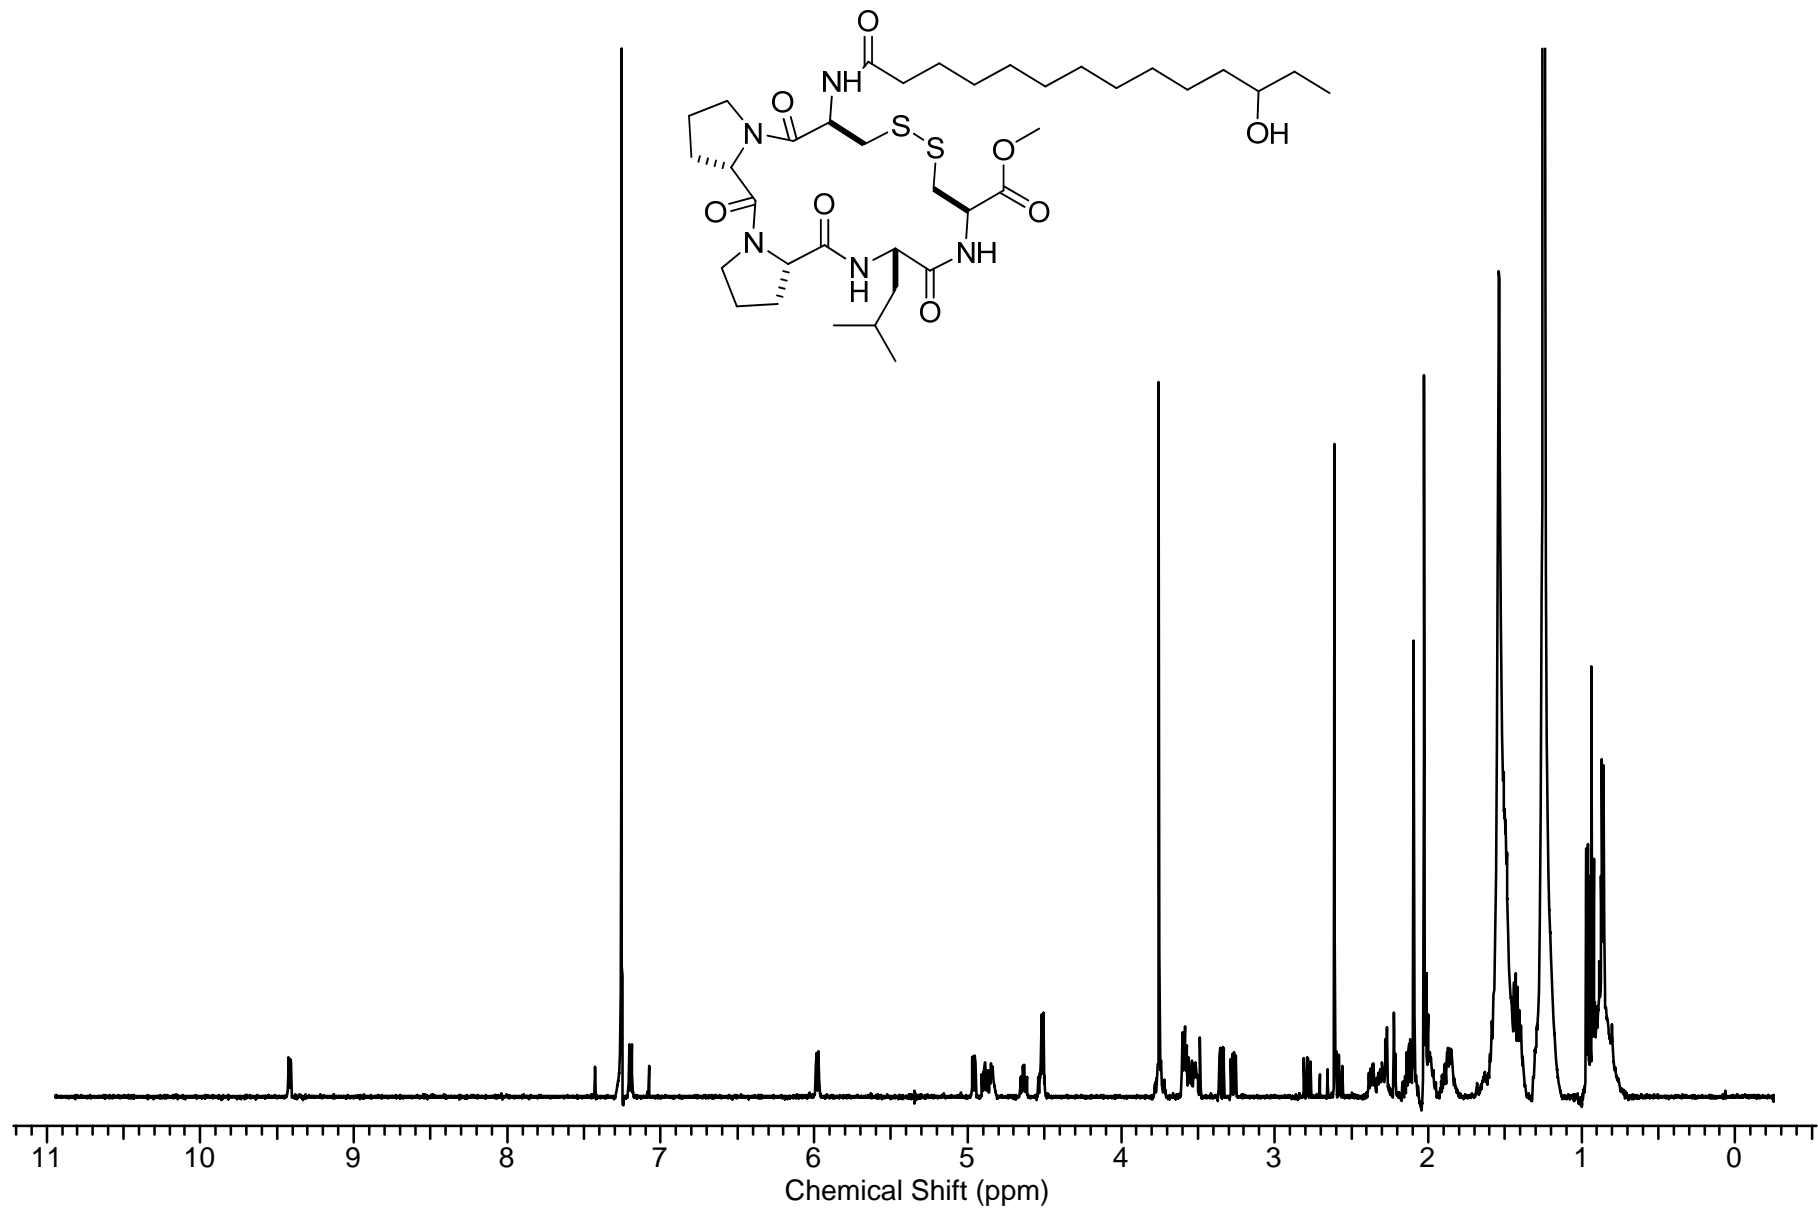

# S18 HSQC Spectrum of Eudistomide B epimers (**2**, **12**) in CDCl<sub>3</sub>

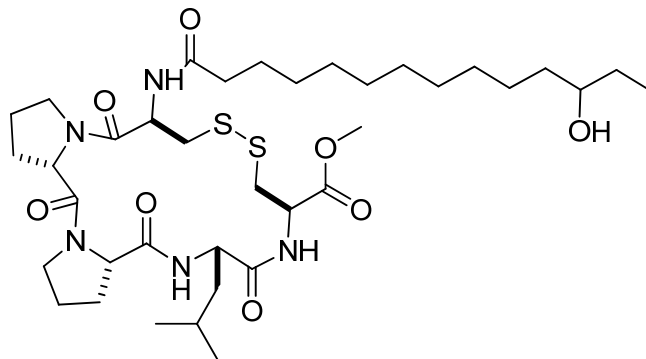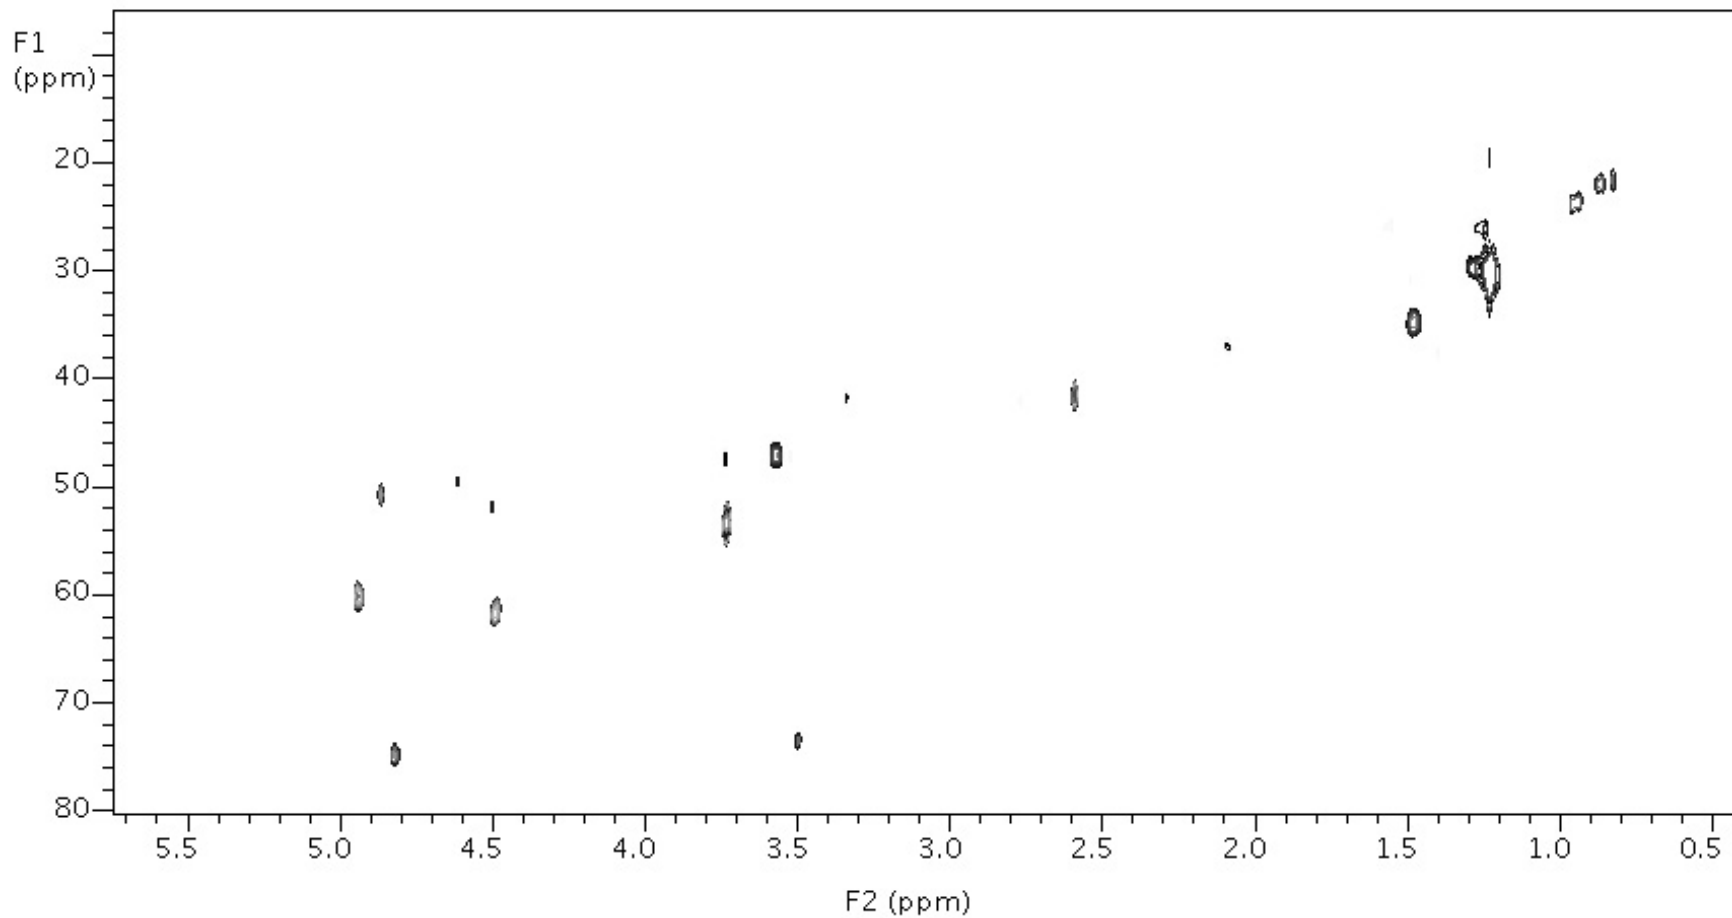

# S19 $^1\text{H}$ NMR Spectrum of Eudistomide B acetate ester epimers (**13**, **14**) in $\text{CDCl}_3$

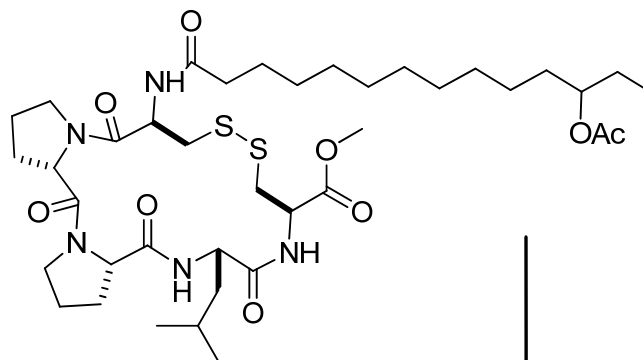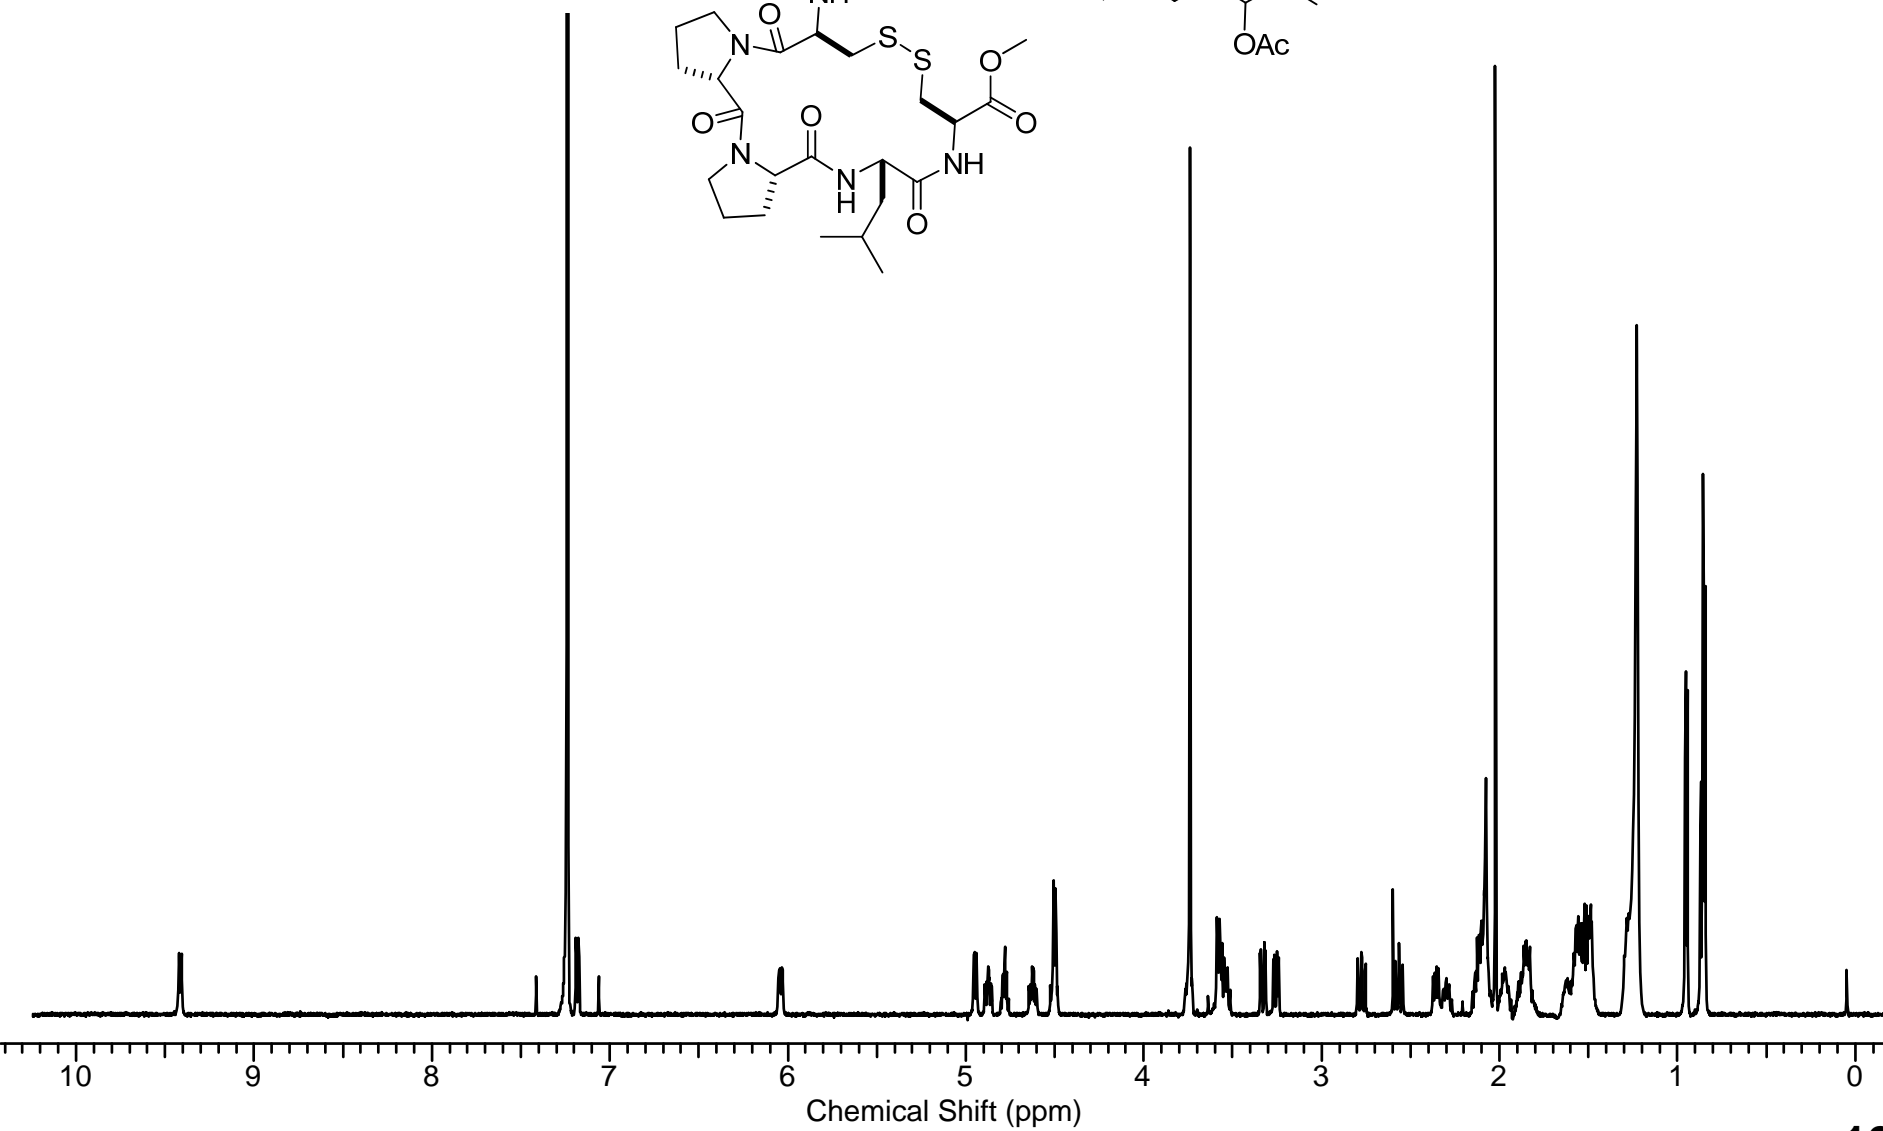



# S21 $^1\text{H}$ NMR Spectrum of the lipase reaction products (**2**, **13**, **14**) in $\text{CDCl}_3$

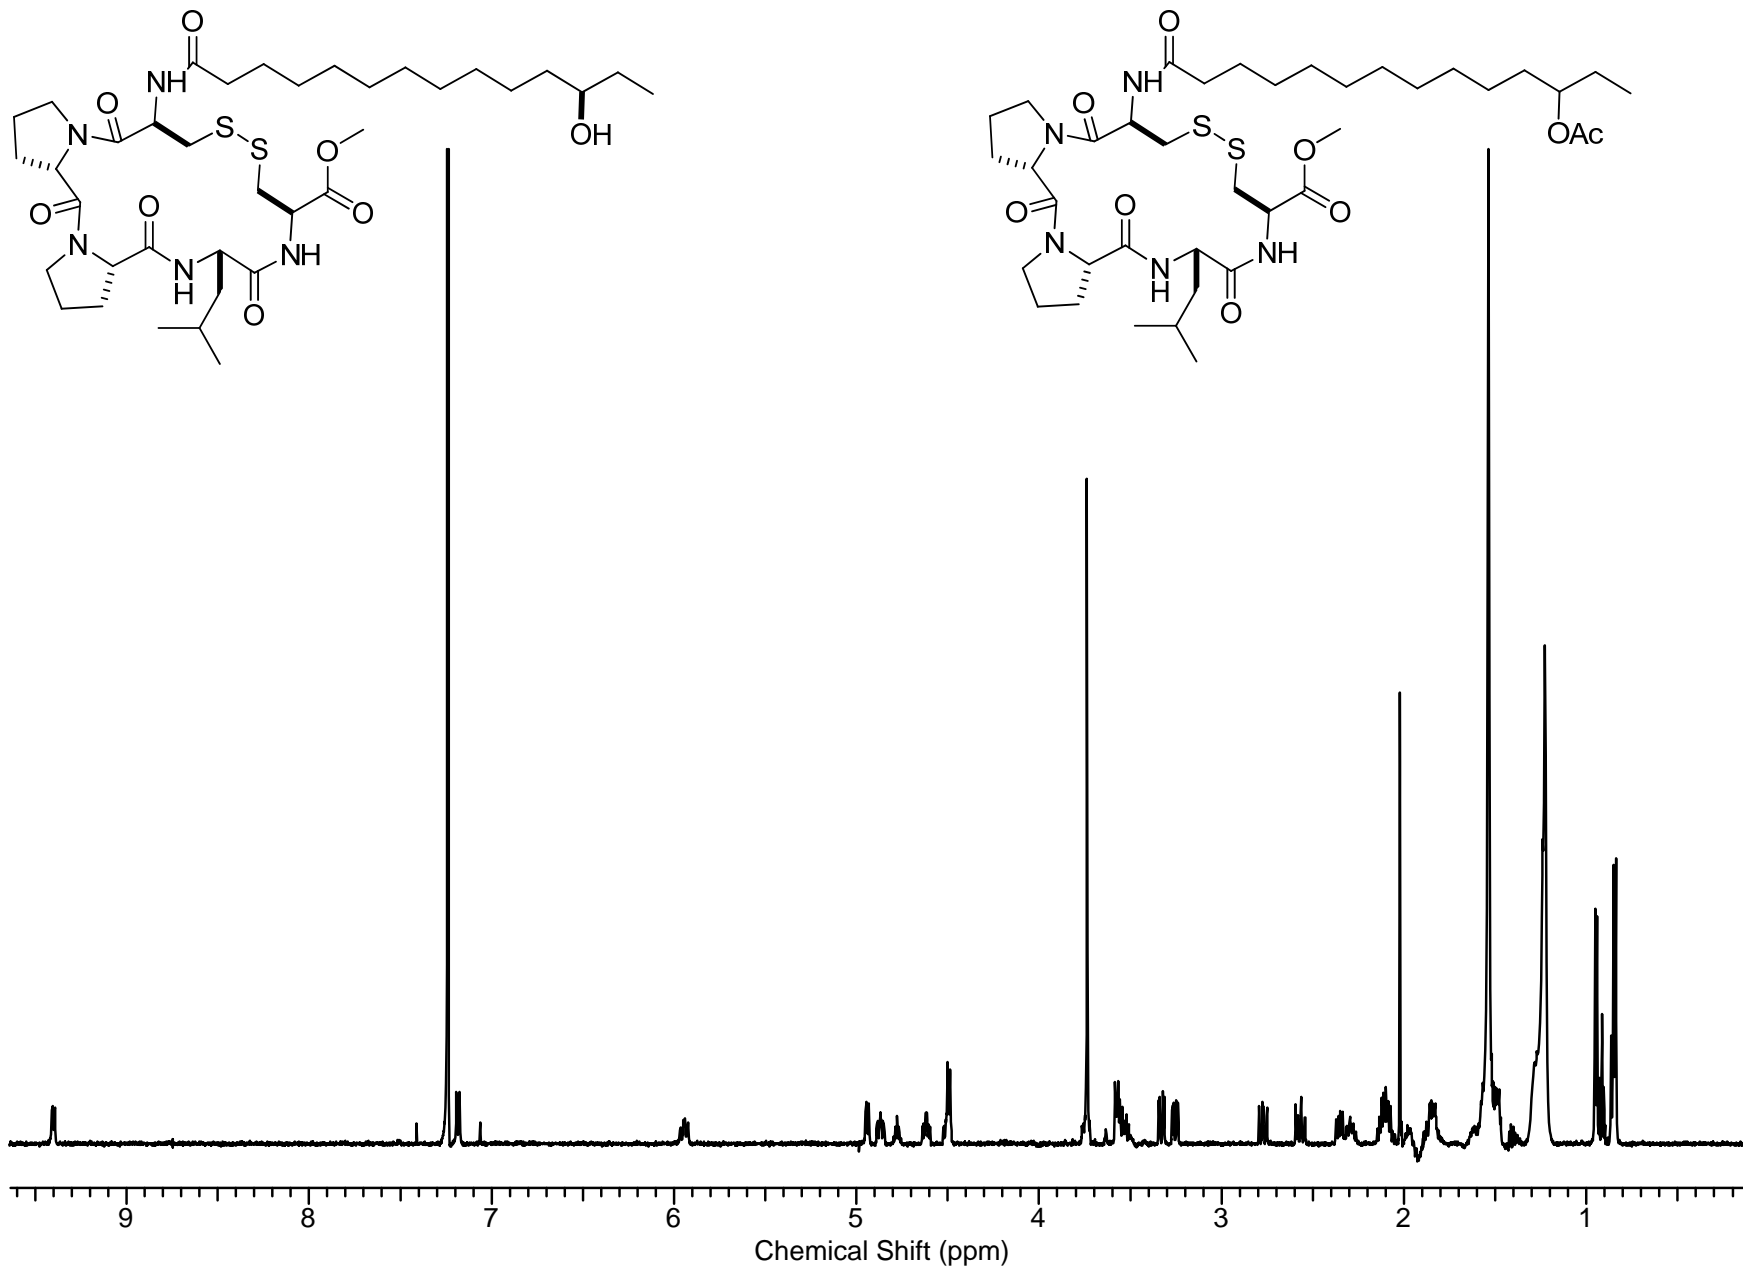

Supplement: NIHMS86611-supplement-1_si_001.pdf [file NIHMS86611-supplement-1_si_001.pdf]
